1 **Indirect versus Direct Effects of Freshwater Browning on**  
2 **Larval Fish Foraging**

3

4 Dina M. Leech, Troy L. Clift, Jessica L. Littlefield, Nicholas R. Ravagli, and Jacob E.  
5 Spain

6

7 Department of Biological and Environmental Sciences  
8 Longwood University Farmville, VA 23901

9

10 **Corresponding Author:** Dina M. Leech, Department of Biological and Environmental  
11 Sciences, 201 High Street, Longwood University, Farmville, VA, 23909; Office #: 434.395.4966;  
12 Email: leechdm@longwood.edu

13

14 **Keywords:** brownification, fish larvae, foraging, predation, zooplankton

15

16 **Running Title:** Browning and larval fish foraging

17

18

19

20

21

22

23

24

25

26

27

28

29

30

31

32

33

34

35

36

37

38 **ABSTRACT**

39

40 Fish foraging and energy flow are both predicted to decline with freshwater 'browning'

41 due to reductions in light availability. Studies investigating these predictions have focused on

42 juveniles and adults; however, the larval stage represents a 'critical period' in fish development.

43 We investigated the indirect versus direct effects of browning on zooplankton-larval fish

44 interactions by altering water color with SuperHume (absorbance at 440 nm = 1.6 – 10.8 m<sup>-1</sup>).

45 Phytoplankton and zooplankton densities were monitored across experimental tanks in the

46 laboratory for one month leading up to fish spawning. Larval largemouth bass were then

47 introduced to assess indirect effects on fish feeding rates and growth. Direct effects on foraging

48 of largemouth bass and bluegill were determined with separate short-term feeding

49 experiments. Browning did not directly alter the ability of larval fish to capture prey. However,

50 significant indirect effects on larval fish foraging, growth, and survival were observed as

51 phytoplankton and zooplankton decreased with increased browning. Our data suggest lake

52 browning will reduce energy transfer to larval fish due to a reduction in prey availability but not

53 visual foraging.

54

55

56

57

58

59

60

## 61 **Introduction**

62

63           In recent decades, many freshwater and coastal ecosystems in the Northern  
64 Hemisphere have become browner in color due to an increased export of chromophoric  
65 dissolved organic matter (cDOM) from the terrestrial watershed (Monteith et al. 2007;  
66 Erlandsson et al. 2008; Haaland et al. 2010; Solomon et al. 2015). The mechanisms underlying  
67 this ‘browning’ are currently debated and include changes in climate, hydrology, and land use,  
68 reduced atmospheric acid deposition, and increased inputs of dissolved iron (Freeman et al.  
69 2001; Monteith et al. 2007; Erlandsson et al. 2008; Kritzberg and Ekström 2012). Whatever the  
70 mechanism, this phenomenon has far reaching ecological consequences for the structure and  
71 function of aquatic ecosystems, including energy flow.

72           One concern is the effect of browning on the underwater light environment. As waters  
73 become browner in color, the quantity of light in the water column is reduced, resulting in a  
74 shallower euphotic zone (Bukaveckas and Robbins-Forbes 2000; Einem and Graneli 2010). In  
75 addition, shorter wavelength ultraviolet and visible radiation are more readily absorbed by  
76 cDOM compared to longer wavelengths (Morris et al. 1995; Wetzel 2001). Consequently, the  
77 light environment shifts to the red portion of the visible spectrum. These alterations in the  
78 quantity and quality of light have the potential to affect zooplankton-fish interactions--  
79 indirectly through reduced energy transfer up the food chain and directly through reduced  
80 foraging efficiency.

81           While recent studies have shown that the initial browning of low productive systems  
82 can stimulate primary production (Ask et al. 2012; Seekell et al. 2015; Williamson et al. 2015),  
83 excessive browning of fresh waters can reduce rates of photosynthesis due to competition for

84 photons (Kirk 1994). cDOM has been reported to sequester 10 times more photons within the  
85 visible spectrum (400 - 700 nm) compared to photosynthetic pigments (Thrane et al. 2014). As  
86 a consequence, areal primary production often decreases with increased water color (Jones  
87 1992; Carpenter et al. 1998; Ask et al. 2009; Karlsson et al. 2009; Thrane et al. 2014), and  
88 pelagic primary production typically exceeds benthic primary production (Vasconcelos et al.  
89 2018; Vasconcelos et al. 2019). Phytoplankton community composition can also shift to  
90 predominantly cyanobacteria, which are generally less nutritious or inedible to zooplankton  
91 (Ekvall et al. 2013; Robidoux et al. 2015). Overall, aquatic ecosystems often become net  
92 heterotrophic with increased browning as bacterial production exceeds primary production  
93 (Cole et al. 1994; Ask et al. 2012).

94         Reductions in the quantity and quality of basal resources then ‘cascade up’ the grazer  
95 food chain to influence zooplankton and fish. For example, Robidoux et al. (2015) observed  
96 decreases in crustacean zooplankton biomass and density with increased water color while  
97 Craig et al. (2017) found that bluegill in lakes of increasing color were smaller in size and had  
98 lower fecundity compared to those living in lakes with less color. Taipale et al. (2018) noted  
99 that zooplankton and fish had poorer nutritional quality in browner systems because the  
100 phytoplankton on which they fed had lower concentrations of essential fatty acids, proteins,  
101 lipids, and carbohydrates. Combined, these results suggest that freshwater browning indirectly  
102 alters energy flow to higher trophic levels.

103         Trophodynamics between larval fish and zooplankton are particularly important as the  
104 larval stage represents a critical phase in fish development that ultimately affects population  
105 growth and biomass (Fuiman and Werner 2002; Karlsson et al. 2009; Karlsson et al. 2015).

106 Generally, in temperate climates, increased primary production in the late spring/early summer  
107 leads to increased zooplankton production. Shortly thereafter, many fish species begin to  
108 spawn, matching larval fish hatching with an abundance of zooplankton prey (Mills et al. 1989;  
109 Mehner and Thiel 1999; Hansson et al. 2007). However, as fresh waters continue to brown and  
110 energy flow to zooplankton is reduced, fish larvae may compete for fewer zooplankton prey.

111 Freshwater browning may also directly affect fish foraging behavior by altering the light  
112 environment to which fish are adapted. Many fish are visually orienting predators, depending  
113 on the quantity (i.e. intensity) and quality (i.e. spectra) of underwater light to locate and  
114 capture prey (Guthrie and Muntz 1993; Leech and Johnsen 2009). Results from studies  
115 investigating the direct effects of browning on fish foraging are varied, ranging from no effect  
116 to enhanced effects (e.g. Stasko et al. 2012; Jönsson et al. 2013; Weidel et al. 2017). However,  
117 this research has focused on juvenile and adult life history stages, with no knowledge of the  
118 effect of browning on fish larvae.

119 Foraging in early life history stages may be particularly affected by freshwater browning  
120 due the rapid attenuation of shorter wavelength light. Over evolutionary time, the visual  
121 system of fishes spectrally tunes to the intensity and wavelengths of light present in their  
122 environment, varying with age and behavior (Douglas and Djamgoz 1990). Larval fish spend  
123 most of their time foraging in the top few meters of the epilimnion, and many species have  
124 been shown to possess UV photoreceptors during only their early stages of development  
125 (reviewed in Leech and Johnsen 2009). Thus, fish larvae may rely on short-wavelength  
126 ultraviolet and blue radiation to forage (Leech and Johnsen 2009 and references therein).  
127 Alternatively, as light levels decline, fish larvae may rely on other sensory mechanisms to

128 forage, such as olfactory cues or mechanoreception, as demonstrated in marine fish larvae and  
129 zebrafish (Jones and Janssen 1992; Cobcroft and Pankhurst, 2003; Sampson et al. 2013; Carillo  
130 and McHenry 2016).

131 Here, we use laboratory experiments to assess the indirect versus direct effects of  
132 browning on larval fish foraging at the time of hatching (i.e., late spring/early summer in central  
133 Virginia, USA). Based on the primary literature, we hypothesized that increased browning will  
134 reduce phytoplankton biomass, leading to a reduction in zooplankton abundance, and  
135 consequently larval fish foraging efficiency, growth, and survival during an early, critical stage in  
136 development. We then used the same laboratory set up to examine the direct effects of  
137 browning on fish feeding rate and prey selectivity when given equal zooplankton prey,  
138 hypothesizing that fish larvae will consume less prey as water color increases due to a reduction  
139 in light availability for foraging.

## 140 **Methods**

### 141 **Indirect Effects of Browning**

142 Laboratory experiments were conducted in twelve 20 L glass aquaria assembled on  
143 three shelves with four tanks per shelf. The entire shelving unit, including individual shelves,  
144 was covered in black plastic with additional black plastic placed in between each tank.  
145 Experimental tanks were arranged in a randomized block design, with at least one tank from  
146 each treatment on each shelf. Nine tanks were filled with 17 L of artificial lake water made from  
147 the COMBO medium recipe, which provides macro- and micronutrients in relatively high  
148 concentrations to support growth (Kilham et al. 1998). SuperHume, a commercially available  
149 source of humic acid, was then added to the tanks at varying concentrations to adjust the

150 brown color of the water. Three tanks received 7  $\mu\text{g/L}$  of SuperHume to serve as a light brown  
151 treatment (water color measured as absorbance at 440 nm ( $a_{440}$ ) = 1.6  $\text{m}^{-1}$ ), three tanks  
152 received 33  $\mu\text{g/L}$  to serve as a moderate brown treatment ( $a_{440}$  = 5.7  $\text{m}^{-1}$ ), and three tanks  
153 received 66  $\mu\text{g/L}$  to serve as a dark brown treatment ( $a_{440}$  = 10.8  $\text{m}^{-1}$ ). While SuperHume adds  
154 carbon to the system, it does not add nutrients. Thus, despite differences in water color, and  
155 consequently light transparency, our treatments had similar nutrient concentrations. We  
156 adjusted the pH of all tanks to  $\sim 7$  with approximately 2  $\mu\text{L}$  of 2N HCl.

157         Although the experimental use of SuperHume has been previously tested (Lennon et al.  
158 2013; Övergaard 2019), some have cited toxicity concerns for zooplankton (Robidoux et al.  
159 2015). We therefore filled the remaining three tanks with 17 L of lake water from Sandy River  
160 Reservoir, Farmville, VA ( $a_{440}$  = 1.5  $\text{m}^{-1}$ ) to serve as a comparison with our light brown  
161 SuperHume treatment. Lake water was passed through a GF/F filter to remove bacterio-,  
162 phyto-, and zooplankton, as best as possible. Sandy River Reservoir water was not used as the  
163 base water for all browning treatments because of the logistics of transporting and filtering the  
164 necessary large volume of water needed for the experiment.

165         Light was provided by 1.2 m long grow lamps containing two Lumichrome<sup>®</sup> Full  
166 Spectrum Plus fluorescent, 32W bulbs suspended approximately 10 cm above the water surface  
167 of the tanks on each shelf and placed on a 14-hr light, 10-hr dark cycle. While lamps cannot  
168 exactly reproduce the solar spectrum, these specific bulbs were selected based on their broad  
169 coverage of the ultraviolet and visible spectra. An Ocean Optics Red Tide USB650 UV  
170 spectrophotometer was used to measure the light spectrum, based on photon counts, from 250  
171 to 800 nm in each treatment (Figure 1). After the experiment had concluded, we acquired a

172 LiCor LI-192 quantum sensor to estimate photosynthetically active radiation (PAR) across our  
173 treatments. The sensor was placed in the center of the tank at a depth of 0.09 m. PAR ranged  
174 from approximately  $15 \mu\text{mol m}^{-2} \text{s}^{-1}$  in the dark brown treatment,  $22 \mu\text{mol m}^{-2} \text{s}^{-1}$  in the  
175 moderate brown treatment, and  $31 - 35 \mu\text{mol m}^{-2} \text{s}^{-1}$  in the lake water and light brown  
176 treatments. These light levels are comparable to those experienced during crepuscular periods,  
177 when larvae often actively forage (Keast and Welsh 1968; Leech and Johnsen 2009). They are  
178 also representative of light levels experienced at midday in the summer between approximately  
179 1.0 – 2.5 m depth in local, natural systems (i.e.  $\sim 1800 \mu\text{mol m}^{-2} \text{s}^{-1}$  surface irradiance, Figure  
180 S1). All tanks stabilized to a room temperature of 22 - 23 °C under both light and dark  
181 conditions.

182         At the beginning of the experiment, each tank received a dense mixture of  
183 phytoplankton containing equal parts of *Ankistrodesmus* sp., *Chlorella* sp., *Scenedesmus* sp.,  
184 and *Selenastrum* sp., which resulted in an initial chlorophyll-*a* concentration of approximately  
185 10  $\mu\text{g/L}$  in all tanks. Algae were purchased from Carolina Biological and cultured in COMBO  
186 medium prior to the experiment. A mixed assemblage of zooplankton was then added to each  
187 tank. Zooplankton were collected from Sandy River Reservoir the day before the experiment by  
188 towing a 64  $\mu\text{m}$  mesh bongo net from 0 - 6 m several times. Prior to introduction, zooplankton  
189 were concentrated into a single 4 L container, mixed, and then 50 mL aliquots were introduced  
190 into each tank to provide a starting density of approximately 26 zooplankton per liter in each  
191 tank. This initial relatively low density permitted observations of population growth over time  
192 and reflected natural zooplankton concentrations in the early spring in local systems.  
193 Proportionally, the zooplankton assemblage consisted of 80% copepods (mostly cyclopoids),



194 15% cladocerans (*Daphnia* sp. and *Bosmina* sp.), and 5% rotifers (*Keratella* sp.). We removed all  
195 *Chaoborus* before introducing the zooplankton to the tanks to minimize zooplankton mortality  
196 due to predation.

197 Over the course of the next month, phytoplankton biomass and zooplankton abundance  
198 were measured at 0, 3, 7, 14, 21 and 28 days. Before each sampling, tanks were gently mixed  
199 with a broad, plastic spoon. For phytoplankton, two replicate 50 mL water samples were  
200 removed from each tank and filtered through Whatman GF/F filters to measure chlorophyll-*a*  
201 concentration as a proxy for phytoplankton biomass. Filters were placed in 90% acetone  
202 overnight in the freezer and then chlorophyll-*a* concentration was measured on a Shimadzu  
203 Trilogy Fluorometer using the non-acidification module. Chlorophyll-*a* concentrations are  
204 reported as the average of these two replicates. One hundred milliliters of DI water were added  
205 to each tank to replace the 100 mL removed for chlorophyll-*a* analysis, keeping the volume at  
206 ~17 L.

207 For zooplankton, 3 L of water from each tank was passed through a 64  $\mu\text{m}$  mesh cup,  
208 and then the water was immediately returned to the tank to maintain a constant volume.  
209 Zooplankton collected on the mesh were rinsed into a sample cup and preserved with 70%  
210 ethanol. Zooplankton were identified and enumerated under a dissecting microscope at 40x in  
211 a Ward counting wheel. Zooplankton density (individuals per liter) was determined by counting  
212 the total number of rotifers, copepods, and cladocerans in each sample collection and then  
213 dividing by the total volume of water sampled (i.e. 3 L).

214 Because bacteria can serve as an alternate food source for zooplankton, either directly  
215 or through the microbial loop (Sanders and Porter 1990; Wylie and Currie 1991), we measured

216 bacterial abundance at Days 0 and 28. Five milliliters of water were collected from each tank  
217 with a serological pipet, placed in a sterile culture tube, and preserved with glutaraldehyde.  
218 Samples were refrigerated until analysis. Bacterial abundance was determined by counting  
219 DAPI stained cells under an epifluorescent microscope at a magnification of 100x, based on the  
220 methods of Porter and Feig (1980). A minimum of 400 cells were counted per sample to  
221 determine cell density per milliliter.

222         After 28 days, two larval largemouth bass (*Micropterus salmonoides*), 10-12 mm in  
223 standard length (i.e. body length excluding tail), were introduced to each tank. Preliminary  
224 experiments determined the fish behaved better in pairs compared to single introductions. We  
225 chose to introduce the larvae after one month to simulate the timing of fish hatching in nature  
226 following an increase in algae and zooplankton in late spring (Mills et al. 1989; Mehner and  
227 Thiel 1999; Hansson et al. 2007). Because we were unable to successfully obtain fish larvae  
228 from Sandy River Reservoir prior to the experiment, we used larvae from a local pond with  
229 similar optical characteristics. Fish larvae were collected using light traps (Aquatic Instruments,  
230 Inc., Hope, ID) anchored in the littoral zone of the pond overnight. Fish were immediately  
231 transported back to the lab and housed for 24 hours without food. Fish collection and care  
232 followed approved institutional animal care and use protocols.

233         Once introduced to the experimental tanks, the fish larvae were allowed to feed for 24  
234 hours. After which, zooplankton were sampled as described above. This provided an estimate  
235 of daily zooplankton consumption in each treatment, assuming that total zooplankton  
236 consumed was represented by the difference in zooplankton density at the beginning and end  
237 of fish feeding. We also assumed that the two fish in each tank fed equally, such that the

238 difference in zooplankton density was divided by 2 to estimate daily consumption rates per fish  
239 larva.

240 Fish were then allowed to feed in the tanks for another 5 days with survival monitored  
241 daily. After which, fish larvae were euthanized in MS-222, and final measurements were taken  
242 of their body length under a dissecting microscope to estimate growth. Because we could not  
243 clearly distinguish the two fish in each tank, growth was estimated as the average size of the  
244 two fish at the beginning versus the end of the experiment. A final collection was also made of  
245 zooplankton density in the tanks. However, zooplankton abundance was too low in all the tanks  
246 to make accurate counts.

247 Throughout the experiment, a YSI 600 XLM sonde was used to measure water  
248 temperature, conductivity, pH, and dissolved oxygen concentration in each tank. To monitor  
249 potential changes in water color over time, a Shimadzu UV/Vis spectrophotometer was used to  
250 measure absorbance at 440 nm of water filtered through a GF/F filter. Dissolved organic carbon  
251 (DOC) concentration was also monitored during the experiment using GF/F filtrate. Samples  
252 were run on a Shimadzu TOC-L analyzer.

### 253 **Direct Effects of Browning**

254 The same experimental setup was used to investigate direct effects of browning on fish  
255 foraging efficiency. However, we did not use a lake water control. Light to dark brown water  
256 color treatments consisted of four replicate tanks assembled in a randomized, block design on  
257 the three shelves. After adding SuperHume to the tanks, we noted that water color ranged  
258 from  $a_{440} = 1.6$  to  $13.1 \text{ m}^{-1}$ . In each tank, the pH was adjusted to approximately 7, and the  
259 water was allowed to equilibrate to room temperature (22 - 23°C). A YSI 600 XLM sonde was

260 used to determine the water temperature, conductivity, dissolved oxygen concentration, and  
261 pH of each tank prior to the beginning of each feeding experiment.

262 Both zooplankton and larval *Micropterus salmonoides* were collected from Sandy River  
263 Reservoir. Fish larvae were starved for 24 hours prior to the experiment. For each experimental  
264 tank, two larval fish (~13 mm in length) were introduced and allowed to acclimate for a  
265 minimum of 1 hour. After which, a known concentration of zooplankton prey (i.e. ~ 20  
266 zooplankton/L) was added, and the fish were allowed to feed for 30 minutes. We staggered the  
267 introduction of the zooplankton every 10-15 minutes to allow time for disassembling each tank  
268 at the end of the timed feeding trial. The zooplankton community consisted of approximately  
269 40% cladoceraans (mostly *Daphnia* sp.), 27% adult calanoid copepods, 24% *Chaoborus*, 7%  
270 copepodids, and 2% adult cyclopoid copepods.

271 Fish were removed from the tank and placed in MS-222 for euthanization. The  
272 remaining zooplankton were collected by filtering the water in each tank through a 64  $\mu$ m  
273 mesh. Zooplankton were rinsed off the mesh and into a sample cup with 70% ethanol.  
274 Zooplankton were identified and enumerated under a dissecting microscope at 10 - 40x in a  
275 Ward counting wheel. Zooplankton density per liter was calculated as the total number of  
276 counted zooplankton divided by the total volume of water in the tank (i.e. 17 L). The total  
277 zooplankton consumed per minute by each fish larvae was then calculated as the difference in  
278 zooplankton density at the beginning versus the end of an experiment divided by 30 minutes  
279 and then divided by 2 larvae. We assumed each fish in each tank fed equally during the  
280 experiment. We chose this method rather than examining gut contents to be consistent with

281 previous experiments. Preliminary studies filling and emptying tanks with zooplankton resulted  
282 in ~99% recovery, providing confidence in our methodology (unpublished data).

283 To further explore the direct effects of browning on larval fish foraging, we performed  
284 three additional experiments using the same experimental setup but with bluegill *Lepomis*  
285 *macrochirus* (~13-15 mm in standard length) collected from a local pond. The goal of these  
286 experiments was to test the limits of larval fish foraging under increasing water color by  
287 reducing the foraging time and number of prey. For each experiment, fish larvae were collected  
288 with light traps 24 - 48 hours before the experiment. Two larvae were placed in each tank and  
289 allowed to acclimate for 24 hours prior to the introduction of zooplankton prey. A YSI sonde  
290 was used to confirm that temperature, pH, conductivity, dissolved oxygen concentrations were  
291 similar across all tanks. For the first experiment, fish larvae fed for 24-hours with a relatively  
292 high density of prey (i.e., 130 zooplankton per liter) to estimate daily feeding rates under ideal  
293 conditions. We then conducted two experiments with reduced time and prey concentration to  
294 test the limits of larval fish foraging: 1) a 10-minute feeding trial with 4 zooplankton per liter  
295 and 2) a 5-minute feeding trial with 2 zooplankton per liter. Zooplankton prey remaining in each  
296 tank were collected at the end of each experiment to assess fish feeding rates and prey  
297 selectivity. For all three experiments, zooplankton were collected from the same pond as the  
298 fish larvae and consisted of approximately 80% cladocearans (mostly *Daphnia* sp.), 15%  
299 cyclopoid copepods, 3% *Chaoborus*, and 2% rotifers (*Keratella* sp. and *Asplanchna* sp.).

### 300 **Statistical Analyses**

301 All statistical tests were performed using the R Statistical Environment (R Core Team  
302 2018). For the indirect effects experiment, we used the *nlme* package (Pinheiro et al. 2020) to

303 conduct repeated measures ANOVAs in combination with post hoc Tukey tests to assess  
304 differences in water temperature, conductivity, pH, and dissolved oxygen with browning  
305 treatment, time, and the interaction between time and treatment. Temperature and  
306 conductivity data were log transformed for normality. ANOVAs were computed as linear mixed  
307 models using the *lme* function, including terms for random effects associated with tank number  
308 (i.e. *random* function) and, in some cases, autoregressive effects associated with time points  
309 being unequally spaced (i.e. *corAR1* function). The *anova* function from the *car* package was  
310 used to report the results of the models (Fox and Weisberg 2019). If significant, we used the *cl*  
311 function in the *lsmeans* package (Lenth 2016) to summarize the Tukey results. Residuals from  
312 each test were calculated using the *residuals* function and then plotted with the  
313 *plotNormalHistogram* function from the *rcompanion* package (Mangiafico 2020). Akaike  
314 Information Criteria were used to select the best model, particularly if autoregressive  
315 correlations improved the model.

316 Repeated measures ANOVA with post hoc Tukey tests were also performed on log  
317 transformed chlorophyll-*a* concentrations to assess differences in algal biomass with treatment,  
318 time, and interactions between treatment and time. The test was performed as described  
319 above. In addition, linear regressions of chlorophyll-*a* concentrations in each treatment over  
320 the first week (Days 0, 3, and 7) were performed to determine initial phytoplankton growth  
321 rates, using the slope as an estimate of added algal biomass per day.

322 For the zooplankton, we observed similar densities across treatments except on the last  
323 sampling date. We therefore assessed differences in zooplankton density only on Day 28 with a  
324 Welch's ANOVA. This test is recommended when the data have high heteroscedasticity and is

325 paired with a post hoc Games-Howell test to compute pairwise comparisons of treatments. We  
326 used the *welch\_anova\_test* function from the *rstatix* package (Kassambara 2020). Results from  
327 the Welch's ANOVAs were used to compute effect sizes based on omega squared values.

328 A two-way ANOVA combined with a post hoc Tukey test was used to compare bacterial  
329 abundance across treatments between Day 0 and Day 28. A Shapiro-Wilk's test confirmed data  
330 normality prior to running the ANOVA. The *lme* function in the *nlme* package was used to run  
331 the model, using tank number as a random variable. Summary results were presented with the  
332 *anova* function and residuals were checked with the *residuals* and *plotNormalHistogram*  
333 functions. Results of the Tukey test were observed using the *lsmeans* and *clid* functions as  
334 described above.

335 For the fish data in the indirect effects experiment, we again observed unequal variance  
336 across treatments, and therefore, used Welch's ANOVAs with post hoc Game-Howell tests to  
337 assess potential differences in zooplankton consumption and growth with water color. Because  
338 we noted variability in zooplankton abundance within our treatments, we also calculated  
339 Pearson correlation coefficients between zooplankton prey availability at the time of fish  
340 introduction and zooplankton consumption rates after 24 hours as well as larval fish growth  
341 after 6 days. E\*Indices were calculated to determine potential differences in prey selectivity  
342 with browning (Lechowicz 1982). Values were checked for normality and then a two-way  
343 ANOVA was performed to test for significant differences in prey selectivity between treatment,  
344 zooplankton taxa, and interactions between treatment and taxa. Tukey pairwise comparisons  
345 were performed for significant results.

346 For the direct effect experiment with largemouth bass, we observed differences in the  
347 absorbance coefficients within treatments. We therefore used linear regression analysis to  
348 assess the relationship between zooplankton consumption and water color (i.e. absorbance at  
349 440 nm). For the bluegill experiments, absorbance coefficients were similar within treatments,  
350 and thus, we assessed differences in zooplankton consumption across water color treatments  
351 with Welch's ANOVAs, using omega squared values to estimate effect sizes. E\*Indices were  
352 again calculated, and two-way ANOVAs were performed to assess significant differences in prey  
353 selectivity with treatment, zooplankton taxa, and their interaction. For the largemouth bass  
354 experiment, this required us to bin tanks into light, moderate, and dark brown treatments  
355 based on similarities in  $a_{440}$ , with 4 replicates per treatment.

## 356 **Results**

### 357 **Indirect Effects of Browning**

358 Over the course of the 28-day experiment, there were no significant differences in  
359 water temperature, pH, or dissolved oxygen concentration among the 12 tanks with time or  
360 treatment (Table 1). Conductivity did not significantly vary with time but was significantly lower  
361 in the lake water treatment compared to the SuperHume treatments (Table 1). Absorbance at  
362 440 nm was similar in the light brown and lake water treatments but significantly differed in the  
363 moderate and dark brown treatments (Table 1). Water color decreased during the first week in  
364 all treatments and then remained relatively constant (Figure S2). On average, absorbance  
365 coefficients at 440 nm were  $1.3 \text{ m}^{-1}$  in the light brown and lake water treatments,  $5.0 \text{ m}^{-1}$  in the  
366 moderate brown treatment, and  $9.7 \text{ m}^{-1}$  in the dark brown treatment. DOC concentration  
367 significantly differed among the four treatments, with the light brown treatment having the



368 lowest DOC concentration (2.6 mg/L) and the lake water treatment having the highest DOC  
369 concentration (5.1 mg/L) (Table 1). DOC concentration initially increased by 0.3 – 0.8 mg/L over  
370 the first week of the experiment and then declined by ~0.5 mg/L over the next 3 weeks, except  
371 in the lake water treatment, which did not significantly differ over the next three weeks (Figure  
372 S2). Interestingly, only marginal increases in DOC concentration were observed with  
373 SuperHume additions despite an approximate 10 times increase in water color. Higher DOC  
374 concentrations in the lake water treatment, compared to the SuperHume treatments, were due  
375 to high inputs of non-chromophoric, algal-derived organic carbon in the eutrophic reservoir.

376 Bacterial abundance significantly differed with time ( $F_{(1)}=32.95$ ,  $p=0.0004$ ,  $n=12$ ) and  
377 treatment ( $F_{(3)}=24.11$ ,  $p < 0.0001$ ,  $n=12$ ). Based on the results of the Tukey test, bacterial  
378 abundance in the lake water treatment (i.e.,  $2.86 \times 10^6$  cells per mL  $\pm 1.4 \times 10^5$  S.E.) was  
379 significantly greater than all other treatments (i.e., approximately  $7.1 \times 10^5$  cells per mL  $\pm 1.5 \times$   
380  $10^5$  S.E. in the light brown treatment and approximately  $1.3 \times 10^6$  cells per mL  $\pm 9 \times 10^5$  S.E. in  
381 the moderate and dark brown treatments). This suggests that not all bacteria were removed  
382 from the lake water treatment during the initial set-up, and bacteria were introduced with the  
383 addition of SuperHume. By the end of the experiment, bacterial abundance did not significantly  
384 differ across the light, moderate, and dark brown treatments but was significantly higher in the  
385 lake water treatment (i.e.,  $\sim 3.19 \times 10^6$  cells per mL in the lake water treatment compared to  $\sim 2$   
386  $\times 10^6$  cells per mL in the SuperHume treatments). Interestingly, bacterial abundance differed  
387 by only  $10 \pm 9\%$  between Day 0 and Day 28 in the lake water treatment while in the low,  
388 moderate, and dark brown treatments, bacterial abundance was  $64 \pm 5\%$ ,  $35 \pm 5\%$ , and  $23 \pm 3\%$   
389 higher on Day 28, respectively.

390 Phytoplankton biomass, as estimated by chlorophyll-*a* concentration, significantly  
391 differed with treatment ( $F_{(3)}= 33.79$ ,  $p < 0.0001$ ,  $n=12$ ), time ( $F_{(1)}= 8.07$ ,  $p=0.004$ ,  $n=12$ ), and the  
392 interaction between treatment and time ( $F_{(3)}=20.18$ ,  $p=0.0002$ ,  $n=12$ ) (Table 1; Figure 2). The  
393 highest chlorophyll-*a* concentrations throughout the experiment were observed in the light  
394 brown treatment (i.e., 46.1  $\mu\text{g/L}$  by Day 28, Figure 2) while there was no significant difference  
395 in the moderate brown, dark brown and lake water treatments (i.e., declining to 2 -7  $\mu\text{g/L}$  by  
396 Day 28, Figure 2). Based on slopes from regression analyses, algal growth during the first week  
397 was fastest in the light brown treatment (5.61  $\mu\text{g/L}$  per day  $\pm$  0.25 S.E.) followed by the lake  
398 water (4.15  $\mu\text{g/L}$  per day  $\pm$  0.22 S.E), moderate brown (2.36  $\mu\text{g/L}$  per day  $\pm$  0.28 S.E), and dark  
399 brown treatments (1.51  $\mu\text{g/L}$  per day  $\pm$  0.2 S.E).

400 After 28 days, total zooplankton abundance was significantly different between  
401 treatments ( $F_{(3,3.35)}=34.4$ ,  $p=0.005$ ,  $n=12$ , est  $\omega^2= 0.89$ : 95% CI [0.0, 0.97]). Based on post hoc  
402 pairwise comparisons, zooplankton in the lake water (mean = 190 individuals per L  $\pm$  25 S.E.)  
403 and light brown (mean = 120 individuals per L  $\pm$  35 S.E.) treatments were not significantly  
404 different ( $p>0.05$ ), but the lake water treatment was significantly greater than the moderate  
405 brown (mean = 72 individuals per L  $\pm$  7 S.E.,  $p=0.02$ ) and dark brown treatments (mean = 47  
406 individuals per L  $\pm$  10 S.E.,  $p = 0.003$ ) (Figure 3A). Removing one outlier from the light treatment  
407 resulted in significant differences between all three SuperHume treatments at the  $p \leq 0.01$   
408 level. Overall, the cladoceran *Bosmina* sp. was the most abundant zooplankton in all treatments  
409 by Day 28 (Figure 3B). Despite being the dominant zooplanktors at the beginning of the  
410 experiment, copepods represented only 12% of the zooplankton community in the lake water  
411 treatment and 5% of the zooplankton community in the SuperHume treatments by Day 28

412 (Figure 3D & 3E). *Daphnia* sp. abundance was low in all treatments by Day 28, except for the  
413 light brown treatment (Figure 3C). While counting the zooplankton under the microscope,  
414 flocculant SuperHume was observed, but not quantified, in the guts of cladocerans (i.e.,  
415 *Daphnia* and *Bosmina*) but not calanoid or cyclopoid copepods (Figure 4). Rotifers rapidly  
416 decreased in abundance and were not observed in any of the treatments after Day 7.

417 All fish survived the 6-day incubation in the lake water and light brown treatments.  
418 However, there was a 33% mortality rate in both the moderate and dark brown treatments.  
419 One dead fish was found in two replicate tanks of each treatment after 5-6 days, at which point  
420 most zooplankton were visually depleted in the tanks. In the first 24 hours, fish consumed twice  
421 as many prey in the lake water treatment (i.e. ~610 zooplankton per larva) compared to the  
422 light brown treatment (~323 zooplankton per larva) and four times as many prey than in the  
423 dark brown treatment (~143 zooplankton per larva). However, because of the variability in  
424 zooplankton abundance within treatments, zooplankton consumption by larval fish did not  
425 significantly differ with water color ( $F_{(3,3.49)}=4.79$ ,  $p=0.09$ ,  $n=12$ ,  $\text{est } \omega^2= 0.48$ : 95% CI [0.0, 0.78]).  
426 Rather, zooplankton consumption in the first 24 hours correlated highly with zooplankton  
427 densities at the time fish were introduced to the experimental tanks (Pearson Correlation  
428 Coefficient =0.88,  $P=0.0002$ ; Figure 5A). Proportionally, fish larvae primarily consumed *Bosmina*  
429 in all treatments as they were the most numerous species in the tanks. However, *Daphnia* had  
430 a higher electivity value ( $E^*= 0.24 \pm 0.0004$ ), followed by *Bosmina* ( $E^*= -0.12 \pm 0.02$ ) and then  
431 copepods ( $E^*= -0.64 \pm 0.02$ ). These differences in selectivity of zooplankton taxa were  
432 statistically significant based on a two-way ANOVA ( $F_{(2,20)}=250.9$ ,  $p < 0.0001$ ,  $n=12$ ). No  
433 statistical differences in electivity were observed across treatment ( $F_{(2,20)}= 0.44$ ,  $p = 0.78$ ,  $n=12$ )

434 or the interaction between treatment and taxa ( $F_{(8,20)}=0.64$ ,  $p = 0.73$ ,  $n =12$ ). Note that one dark  
435 brown tank had to be eliminated from the two-way ANOVA because of a lack of *Daphnia* at the  
436 time the fish were introduced.

437 Fish growth over the 6-day feeding experiment was generally greater in the lake water  
438 and light brown treatments compared to the moderate and dark brown treatments; however,  
439 these differences were not significantly different ( $F_{(3,4.02)}=3.17$ ,  $p=0.15$ ,  $n=12$ ,  $est \omega^2= 0.35$ : 95%  
440 CI [0.0, 0.68]). On average, fish grew  $\sim 1.2 - 1.5$  mm in the lake water and light brown  
441 treatments,  $\sim 0.66$  mm in the moderate brown treatment, and  $\sim 0.33$  mm in the dark brown  
442 treatment. Growth was moderately correlated with initial zooplankton abundance in the tank  
443 (Pearson Correlation Coefficient =0.62,  $P=0.03$ ; Figure 5B). After 6 days, the surviving fish larvae  
444 in the moderate and dark brown treatments displayed empty and concave stomachs while  
445 those in the lake water and light brown treatments were full with zooplankton prey (Figure 5C).  
446 Note that previous studies have reported that it takes 4 – 6 hours for larvae to fully evacuate  
447 their guts (Werner 1969).

#### 448 **Direct Effects of Browning**

449 In the experiment with largemouth bass, we observed no significant differences in fish  
450 foraging efficiency with increased browning over the 30-minute feeding trial based on linear  
451 regression (Figure 6). Fish consumed on average 2.5 zooplankton per minute  $\pm 0.3$  S.E. across all  
452 treatments, consuming mostly *Daphnia* sp. (percent consumed =  $61\% \pm 0.03$  S.E.) and  
453 *Chaoborus* sp. (percent consumed =  $57\% \pm 0.07$  S.E.) followed by copepods (percent consumed  
454 =  $0.07\% \pm 0.02$  S.E.). E\*Index values significantly differ across zooplankton taxa ( $F_{(2,27)}= 71.14$ ,  $p$   
455  $< 0.0001$ ,  $n=12$ ), with *Daphnia* sp. (E\* Index=  $0.19 \pm 0.02$  S.E.) and *Chaoborus* sp. (E\* Index =

456 0.15 ± 0.03 S.E.) prey preferred over copepods ( $E^*$  Index=  $-0.7 \pm 0.07$  S.E.). However, prey  
457 selectivity did not significantly differ with treatment ( $F_{(2,27)} = 0.07$ ,  $p = 0.93$ ,  $n=12$ ) or the  
458 interaction between treatment and zooplankton taxa ( $F_{(4,27)} = 0.38$ ,  $p = 0.82$ ,  $n=12$ ).

459         Similar patterns were observed in the experiments with bluegill (Tables 2 and 3).

460 Despite reducing zooplankton prey concentration and foraging time, no significant differences  
461 in foraging rate were detected with increasing water color (Table 2). Similar to largemouth  
462 bass, larval bluegill primarily consumed *Daphnia* sp. and *Chaoborus* sp. prey compared to  
463 copepods in all treatments (Table 3). In the 24-hour experiment, larval bluegill in all treatments  
464 consumed ~80% of the zooplankton in their respective tanks, with low consumption rates for  
465 rotifers (Table 2).

## 466 **Discussion**

467         The transition from endogenous to exogenous feeding is a ‘critical period’ in larval fish  
468 development, characterized by high mortality rates that influence longer-term population  
469 growth (Fuiman and Werner 2002). Here, we demonstrate that browning may add stress to this  
470 critical stage by decreasing zooplankton prey availability. Browning did not, however, directly  
471 alter larval fish feeding efficiency or prey selectivity, suggesting plasticity in foraging behavior  
472 under varying light conditions. To our knowledge, this is the first study examining the effects of  
473 freshwater browning on larval fishes. Understanding the balance between direct versus indirect  
474 effects of browning on early life history stages will improve fish conservation and management  
475 strategies in response to continued organic matter loading with changes in climate and land  
476 use.

477

## 478 **Indirect Effects of Browning**

479           The transfer of energy through the traditional grazer food chain depends on basal  
480 resources to support higher trophic levels. Therefore, one of the most profound effects of  
481 freshwater browning is the reduction in primary production, due to increased light attenuation  
482 (Wetzel 2001; Thrane et al. 2014; Solomon et al. 2015), that subsequently reduces energy flow  
483 to zooplankton and fish (Jones et al. 2012; Solomon et al. 2015; Creed et al. 2018). Our study  
484 supports these general observations and raises concerns for larval fish. With increasing brown  
485 color, we observed a reduction in the quantity of light, decreased phytoplankton biomass, and  
486 decreased zooplankton densities. In turn, the foraging rate, growth, and survival of larval  
487 largemouth bass declined.

488           Starvation affects larval fish more than juvenile or adult stages because of their high  
489 metabolic demands coupled with low energy reserves in their tissues (Fuiman 2002). Within 4 -  
490 5 days at 25 - 30 °C, larvae will likely starve to death given low to no food rations (Fuiman  
491 2002). In the present study, after 6 days at 22 - 23°C, fish larvae in the moderate and dark  
492 brown treatments exhibited a 33% mortality rate while the surviving larvae in these treatments  
493 displayed concave-shaped, empty stomachs. Although we did not quantify gut fullness, these  
494 observations suggest a positive relationship between browning and starvation risk. Fish larvae  
495 were found dead in the darker brown treatments near the end of the experiment (Day 5 or 6)  
496 when zooplankton densities were already visibly depleted.

497           At the time fish larvae were introduced to our experimental tanks, zooplankton  
498 densities in the moderate and dark brown treatments were 2 to 4 times less than in the light  
499 brown and lake water treatments (i.e. 46 - 72 individuals per liter compared to 120 - 190

500 individuals per liter). Daily consumption rates for larval fish are often greater than a larvae's  
501 own biomass (Post 1990). We did not directly measure zooplankton or larval fish biomass in  
502 our study. However, based on published length-weight regressions (larval fish: Brecker 1993;  
503 zooplankton: reviewed in Watkins et al. 2011), we roughly estimate that larval fish biomass was  
504  $\sim 2020 \mu\text{g}$  dry weight per fish at the time of their introduction to the experimental tanks while  
505 total zooplankton biomass was  $\sim 1577 \pm 447 \mu\text{g}$  dry weight in the dark brown treatment,  $\sim 2965$   
506  $\pm 361 \mu\text{g}$  dry weight in the moderate brown treatment,  $\sim 6300 \pm 1582 \mu\text{g}$  dry weight in the light  
507 brown treatment, and  $\sim 4962 \pm 228 \mu\text{g}$  dry weight in the lake water treatment. This resulted in a  
508 ratio of zooplankton:fish biomass of 0.8, 1.5, 3.1, and 2.5 in the dark brown, moderate brown,  
509 light brown, and lake water treatments, respectively. After 24 hours, fish larvae consumed  
510 approximately 0.26, 0.54, 1.0, and 1.5 grams of zooplankton per gram of fish in the dark brown,  
511 moderate brown, light brown, and lake water treatments, respectively. Based on data from  
512 Houde and Zastrow (1990), freshwater fish should consume a minimum of  $\sim 0.5 - 0.7$  grams of  
513 prey per gram of fish per day at  $23^\circ\text{C}$  to meet mean weight-specific growth rates. This suggests  
514 that larvae in the moderate and dark brown treatments were food limited.

515 We placed two larvae in each tank to encourage routine behavior, which resulted in a  
516 fish density of  $\sim 118$  larvae  $\text{m}^{-3}$ . This is relatively high but not uncommon in nature, particularly  
517 during the early months of fish hatching (Santucci et al. 2003). Previous studies have shown  
518 that when zooplankton consumption outweighs zooplankton reproduction, fish larvae may  
519 rapidly deplete their food source, affecting future growth and survival (Mehner and Thiel 1999;  
520 Santucci et al. 2003; Hansson et al. 2007). This may occur more often in brown systems if  
521 zooplankton abundances are low at the time of fish hatching. Furthermore, as surface water

522 temperatures rise as a result of global climate change, fish feeding rates are predicted to  
523 increase as a consequence of higher metabolic rates (van Dorst et al. 2019). Brown waters are  
524 likely to increase in temperature more rapidly due to the increased absorption of solar  
525 radiation (Solomon et al. 2015), further exacerbating competition for limited resources in these  
526 systems.

527         Unlike prey abundance, we did not see significant differences in zooplankton  
528 community composition with increased water color. Others studies have also noted minimal  
529 changes in zooplankton community composition with freshwater browning, and there does not  
530 seem to be a clear pattern in positive versus negative effects on specific zooplankton groups  
531 (Nicolle et al. 2012; Ekvall and Hansson 2012; Kelly et al. 2014; Robidoux et al. 2015; Lebret et  
532 al. 2018; Leech et al. 2018). In the present study, the zooplankton community shifted from  
533 copepod to cladoceran dominated across all treatments, with smaller-bodied *Bosmina* the  
534 dominant zooplankton prior to larval fish introduction. Abundances of large-bodied *Daphnia*  
535 were similar in all treatments during the first two weeks of the experiment, but for unknown  
536 reasons, continued to increase only in the light brown treatment (i.e., ~ 30 individuals per L at  
537 Day 28). It is possible that the light brown treatment provided the ideal diet for *Daphnia*, with  
538 sufficient carbon and nutrients from both algal- and terrestrially-derived resources (Lennon et  
539 al. 2013; Gall et al. 2017; Tang et al. 2018).

540         Overall, the zooplankton community that developed in our experiment provided a  
541 standard diet for fish larvae. Typically, larger crustacean zooplankton promote foraging success,  
542 growth, and survival (Crowder et al. 1987; Mills et al. 1989). However, for younger larvae that  
543 are gape-limited, smaller prey, like *Bosmina* spp., can be more beneficial (Mehner and Thiel



544 1999). Nevertheless, zooplankton prey abundance in the moderate and dark brown treatments  
545 was too low to support larval development.

546           Similar to previous studies (Batt et al. 2015; Karlsson et al. 2015; Solomon et al. 2015),  
547 reduced zooplankton abundance coincided with reduced phytoplankton biomass as browning  
548 increased. Interestingly, despite having similar water color, the light brown and lake water  
549 treatments displayed opposite trends in phytoplankton biomass after Day 14. In the lake water  
550 treatment, increased zooplankton abundance likely resulted in greater consumption of  
551 phytoplankton biomass. However, we are uncertain why the same pattern did not occur in the  
552 light brown treatment. It is possible that the light brown treatment, made with the COMBO  
553 medium, provided phytoplankton with more nutrients for growth to keep up with zooplankton  
554 consumption. We were unable to measure nutrient concentrations at the time of these  
555 experiments; however, water quality monitoring data collected by the Virginia Department of  
556 Environmental Quality for Sandy River Reservoir indicate generally lower nitrogen and  
557 phosphorus concentrations than present in the COMBO medium.

558           Phytoplankton species composition and nutritional quality were not assessed as part of  
559 our study; however, we recognize that these factors can also influence energy and nutrient  
560 availability for zooplankton, and consequently larval fish (Taipale et al. 2018; Creed et al. 2018).  
561 Because of logistics, we chose to use an artificial assemblage of green algal species that are  
562 generally favorable foods. In nature, phytoplankton communities can shift towards  
563 cyanobacteria with increased water color, which could further reduce zooplankton densities  
564 (Ekvall et al. 2013; Robidoux et al. 2015). It is also possible that the algae used in our  
565 experiment may not have been adapted to the low light conditions of brown water systems

566 given that they were purchased from Carolina Biological. However, our results are comparable  
567 to field studies examining natural communities along a water color gradient (Ask et al. 2009;  
568 Karlsson et al. 2009; Thrane et al. 2014).

569         Reductions in prey consumption, and possibly less nutritious prey, ultimately led to  
570 reductions in fish growth. Fish larvae in the lake water and light brown treatments, on average,  
571 grew twice as fast as the larvae in the moderate brown treatment and four times faster than  
572 the larvae in the dark brown treatment. Although, we recognize that there was relatively high  
573 unexplained variability in growth within our treatments (e.g. fish in two replicate tanks of the  
574 moderate brown treatment exhibited no growth while the third replicate exhibited relatively  
575 high growth). Growth rates are important for several reasons. Larval fish become better at  
576 avoiding predators and detecting prey as swimming strength and visual acuity increases with  
577 body size (Fuiman 2002). In addition, larger larvae consume bigger, more energy-rich prey.  
578 Growth in juvenile and adult fish is often slower in brown compared to blue lakes, resulting in a  
579 smaller length-at-age (Estlander et al. 2010; Horppila et al. 2010; Benoit et al. 2016; van Dorst  
580 et al. 2018), and our data suggest similar patterns for larval fish. These reductions in individual  
581 growth lead to further reductions in population growth and fish biomass as lakes darken in  
582 color (Karlsson et al. 2009, 2015; Finstad et al. 2014), which can alter food web structure and  
583 lower fisheries yields.

584         Importantly, the results of our indirect effects experiment were influenced by the timing  
585 of fish introduction at Day 28. If the fish had been introduced at earlier time points, when  
586 zooplankton densities were similar in all treatments, we likely would have observed no effect of  
587 browning on larval fish. Indeed, in systems with low prey availability, fish foraging, growth, and

588 survival are reduced regardless of water color (Mehner and Thiel 1999; Santucci et al. 2003;  
589 Hansson et al. 2007). Nonetheless, similar to our experimental results, browning has been  
590 demonstrated in field and laboratory studies to reduce zooplankton densities (e.g. Ekvall et al.  
591 2013; Robidoux et al. 2015; Leech et al. 2018). Moreover, it is often stated that these  
592 differences in prey availability affect fish growth and survival, but experimental evidence is  
593 limited. Here, we provide quantitative data on how alterations in prey densities, due to  
594 increased browning, may affect larval fish foraging, growth, and survival in nature. We argue  
595 that these valuable data can served as a starting point to design larger-scaled mesocosm  
596 experiments or observational studies.

#### 597 **Direct Effects of Browning**

598       When given an equal abundance of zooplankton prey, neither the foraging efficiency  
599 nor prey selectivity of larval largemouth bass or bluegill were affected by increased browning.  
600 Our results are similar to Stasko et al. (2012), which found no significant effect of browning on  
601 juvenile roach feeding rates but are contrary to Jönsson et al. (2013), which reported decreases  
602 in reactive distance and capture success of piscivorous Northern pike (*Esox lucius*) feeding on  
603 roach (*Rutilus rutilus*) with increased water color. Weidel et al. (2017) reported significant  
604 effects of browning on juvenile largemouth bass and bluegill foraging, but water color explained  
605 only ~25-28% of the variation in foraging rates. Combined, results from our study and others  
606 (Estlander et al. 2012; Ranaker et al. 2012; Nurminen et al. 2014) suggest that effects of  
607 browning on fish foraging rates may be age- or species-specific.

608       Light intensities across all our treatments (i.e. ~15 – 35  $\mu\text{mol m}^{-2} \text{s}^{-1}$  PAR) may have been  
609 adequate for larval fish foraging, resulting in the lack of direct effects. For example, Miner and

610 Stein (1993) reported that larval bluegill successfully feed on zooplankton at light intensities  
611 above 450 lux (i.e.,  $\sim 8 \mu\text{mol m}^{-2} \text{s}^{-1}$  based on the conversion factor for sunlight). Some have  
612 suggested that reductions in light levels have a greater effect on later life history stages of fish  
613 because of the positive relationship between sighting distance and body size (Askne and Giske  
614 1993; Fiksen et al. 2002). If browning does directly affect visual foraging, it may do so by  
615 limiting the thickness and daily duration of the photic zone, such that there is a spatiotemporal  
616 contraction of foraging habitat critical to growth and survival. Additionally, the metabolic costs  
617 associated with searching for prey may increase with reductions in light levels, particularly if  
618 prey availability declines with increased browning.

619 Larval fish used in our experiments may have been pre-adapted to the low-light  
620 environment of brown water systems. In general, the man-made reservoirs and ponds of  
621 central Virginia, USA have relatively high light attenuation due to increased cDOM inputs  
622 and/or increased phytoplankton growth (Figure S1). Compared to local lakes and ponds in the  
623 region, our dark brown treatment increased water color approximately 10 times. However, we  
624 may have seen direct effects of browning on fish feeding had we continued to add organic  
625 matter to the tanks. Moreover, fish inhabiting clear, blue lakes may show a greater response to  
626 freshwater browning than those in our study (Stasko et al. 2015), and we encourage further  
627 experimentation with larvae from these systems.

628 Because foraging success plays a critical role in survival and reproduction, there is likely  
629 strong selection pressure to adapt to changing environmental conditions. As light availability for  
630 visual foraging declines with browning, fish may shift from vision to other sensory mechanisms,  
631 such as mechanoreception or olfactory cues, to detect zooplankton prey. For example, previous

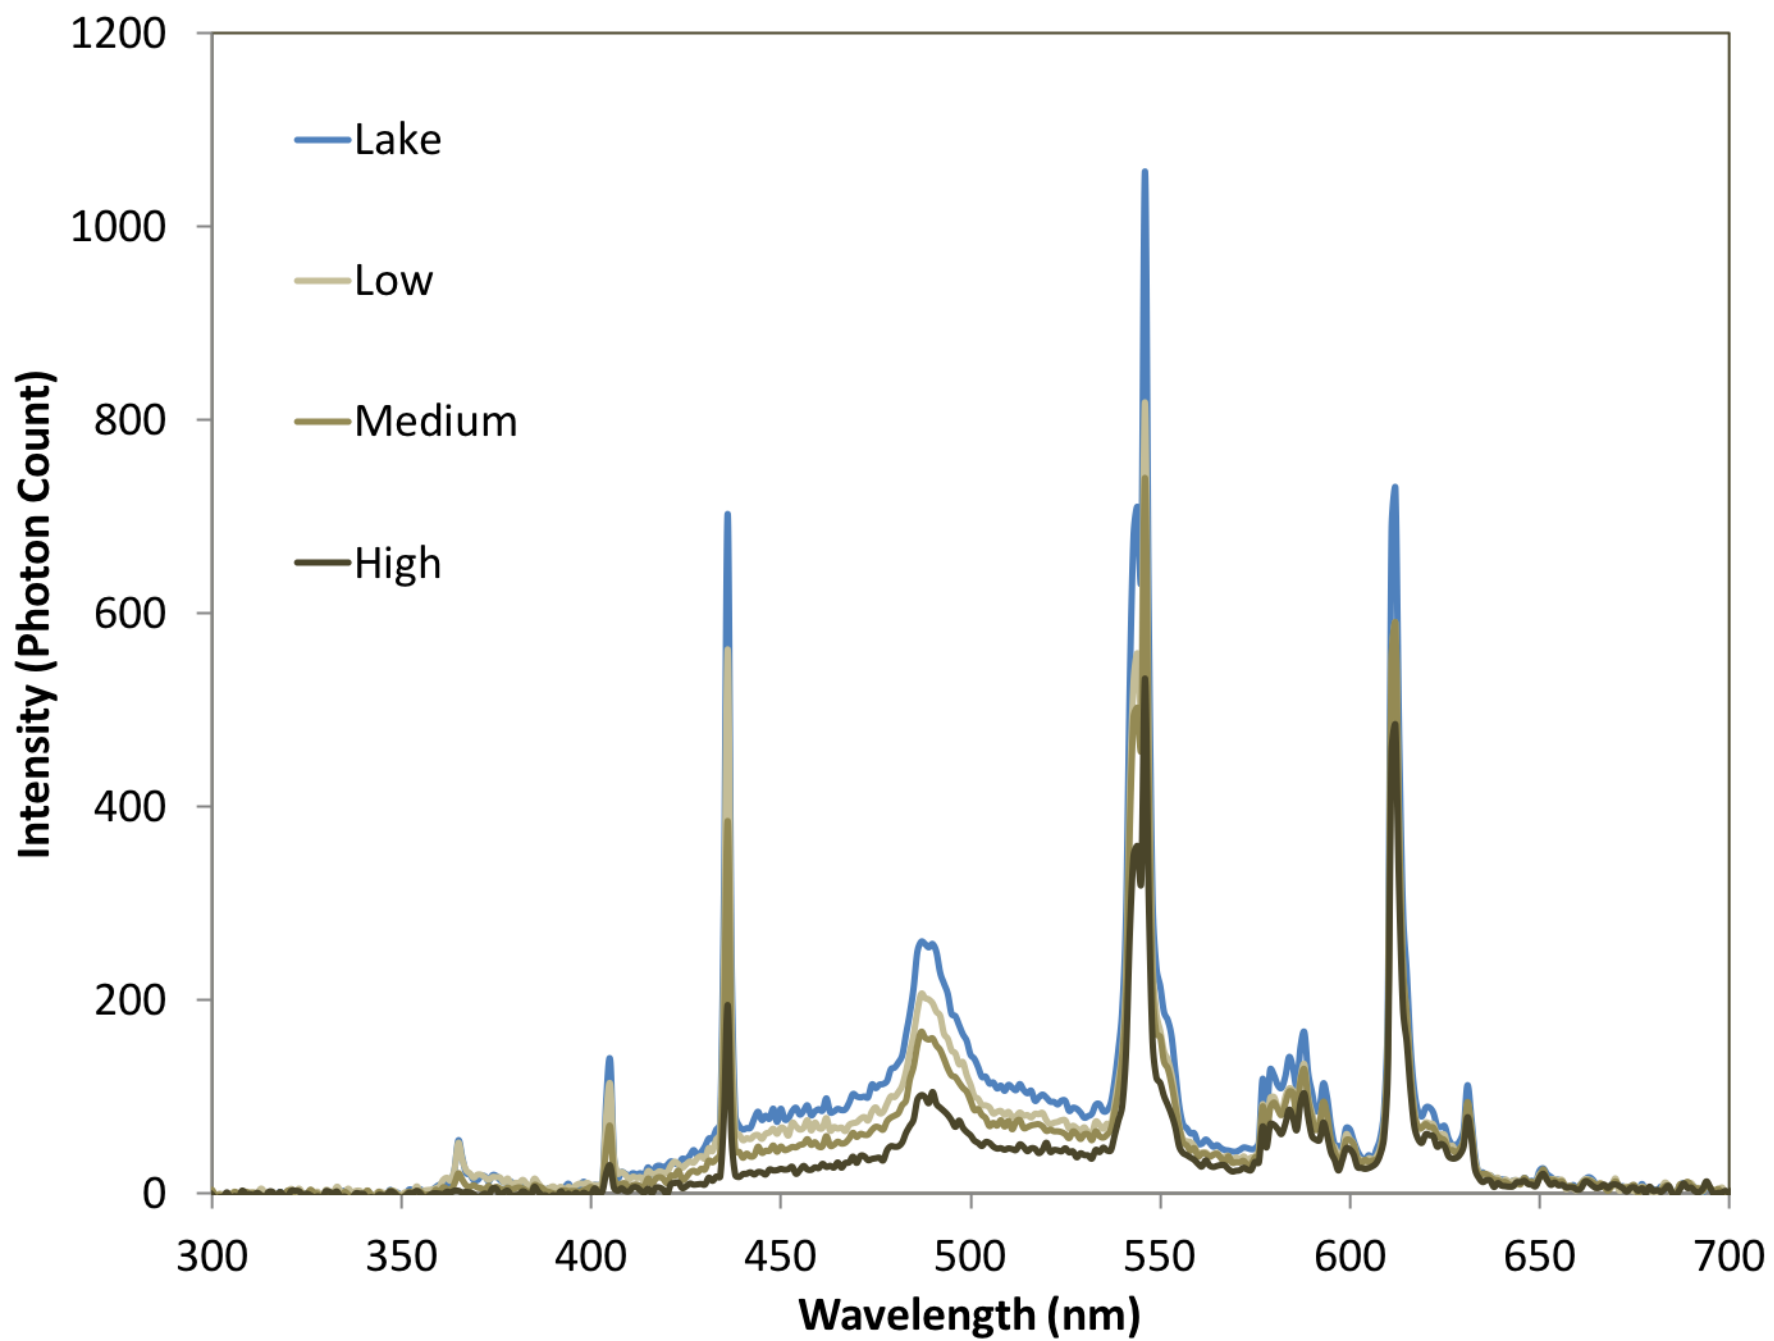

632 research ablating the function of superficial neuromasts with neomycin or streptomycin has  
633 shown reduced feeding rates in marine fish larvae (Jones and Janssen 1992; Cobcroft and  
634 Pankhurst, 2003; Sampson et al. 2013). Larval zebrafish have been shown to learn to use  
635 mechanoreception to feed in the dark (Carillo and McHenry 2016). There is also recent  
636 evidence that juvenile bluegill may actually feed more in the open pelagic water column at  
637 night and horizontally migrate towards the littoral zone during the day to avoid piscivorous  
638 predators (Shoup et al. 2014). Future research should investigate the potential for alternative  
639 feeding strategies as waters brown in color and be cautious about our biases as human  
640 researchers relying on light and vision (Cumming et al. 2018).

#### 641 **Small Enclosures versus Natural Systems**

642 We recognize that our experiment was conducted in relatively small containers and that  
643 caution must be applied when scaling up results to natural systems. Nevertheless, our  
644 observations of phytoplankton, zooplankton, and fish responses to browning are similar to  
645 those reported by recent field-based studies (Karlsson et al. 2009, 2015; Finstad et al. 2014 and  
646 others mentioned above), providing confidence in our results. Working with fragile fish larvae is  
647 challenging, and smaller containers minimize some of the logistical constraints. Yet, the small,  
648 confined tank could have influenced feeding rates. Given the size of larvae used in our  
649 experiments (10 - 13 mm), their visual acuity, or reaction distance, is approximately one body  
650 length (Werner 1969). However, we do not know how long it took larvae to search the tank.  
651 Larger containers may have revealed greater differences in feeding rates across treatments,  
652 similar to Weidel et al. (2017).

653 We also did not quantify the spatial distribution of zooplankton in the tanks, which  
654 could have influenced feeding rates. Experimental tanks were covered during the feeding trials  
655 to avoid distracting the fish. Zooplankton are known to swim downward in the presence of light  
656 and fish, and it is possible that the zooplankton could have clumped at the bottom of the tanks,  
657 making them easier to find and capture. However, this behavioral pattern in the zooplankton  
658 was not obviously apparent to us while breaking down the tanks.

659 Interestingly, Seekell et al. (2018) reported that the relationship between fish biomass  
660 and water color was more negative in deep lakes compared to shallow lakes within the boreal  
661 region of Sweden. The authors state that the negative effects of browning associated with light  
662 extinction and decreased primary production are minimized in shallow lakes because light often  
663 reaches the lake bottom. Moreover, most fish inhabiting deeper lakes were observed in the  
664 littoral zone. Moving into shallow waters may provide fish adequate light to forage in brown  
665 waters, as supported by our results in shallow, experimental tanks (i.e., ~0.2 m depth).

## 666 **Implications and Applications**

667 Given increasing trends in temperature and precipitation with global climate change,  
668 the browning of inland and coastal waters is predicted to continue, with far reaching  
669 consequences for aquatic ecosystems (de Wit et al. 2016; Weyhenmeyer et al. 2016). Here, we  
670 demonstrate that freshwater browning reduces energy flow to higher trophic levels, negatively  
671 affecting larval fish growth and survival during a 'critical period'. Because of their ecological and  
672 economic value, fish population dynamics are closely monitored and predicted by natural  
673 resource managers and conservationists. While current population growth models focus on the  
674 importance of temperature and nutrients (e.g., Deslauriers et al. 2017), our study and others,

675 highlight the need to incorporate water color (i.e. cDOM) to more accurately predict  
676 recruitment strength, sustainable yields, and food web stability in systems affected by  
677 browning.

678

679

680

681

682

683

684

685

686

687

688

689

690

691

692

693

694

695

696

697

698

699

700

701

702

703

704

705

706

707

708

709



710 **Acknowledgements**

711 We thank David and Navona Hart for granting access to their pond and Mark Rolfing for his  
712 assistance in counting bacteria samples. Funding for this research came from the Longwood  
713 University PRISM Summer Research Program and a faculty development grant to DML from  
714 Longwood University. Collection of larval bluegill and largemouth bass was approved by the  
715 Virginia Department of Game and Inland Fisheries, Permit# 051397. This manuscript was  
716 improved by thoughtful comments from Sönke Johnsen, Tessa DeWalt, and two anonymous  
717 reviewers.

718

719

720

721

722

723

724

725

726

727

728

729

730

731

732

733

734

735

736

737

738

739

740

741

742 **References**

- 743 Aksnes, D. L. and Giske, J. 1993. A theoretical model of aquatic visual feeding. *Ecol. Model.* **67**:  
744 233-250.  
745
- 746 Ask, J., Karlsson, J. and Jansson M. 2012. Net ecosystem production in clear-water and brown-  
747 water lakes. *Glob. Biogeochem. Cyc.* **26** 7. doi:10.1029/2010GB003951.  
748
- 749 Bartels, P., Hirsch, P. E., Svanbäck, R. and Eklöv, P. 2016. Dissolved organic carbon reduces  
750 habitat coupling by top predators in lake ecosystems. *Ecosystems* **19**: 955-967.  
751
- 752 Batt, R. D., Carpenter, S.R., Cole, J.J., Pace, M.L. Johnson, R.A., Kurtzweil, J.T. and Wilkinson,  
753 G.M. 2015. Altered energy flow in the food web of an experimentally darkened lake.  
754 *Ecosphere* **6**(3): 33. <http://dx.doi.org/10.1890/ES14-00241.1>.  
755
- 756 Benoît, P.O., Beisner, B.E, and Solomon, C.T. 2016. Growth rate and abundance of common  
757 fishes is negatively related to dissolved organic carbon concentration in lakes. *Can. J.*  
758 *Fish. Aq. Sci.* **73**(8): 1230-1236. <https://doi.org/10.1139/cjfas-2015-0340>.  
759
- 760 Breck, J. Hurry up and wait: Growth of young bluegill in ponds and in simulations with an  
761 individual-based model. *Trans Amer Fish Soc* **122**: 467-480.  
762
- 763 Bukaveckas, P.A. & Robbins-Forbes, M. 2000. Role of dissolved organic carbon in the  
764 attenuation of photosynthetically active and ultraviolet radiation in Adirondack lakes.  
765 *Freshw. Biol.* **43**(3): 339–354.  
766
- 767 Carrillo, A, and McHenry, M.J. 2016. Zebrafish learn to forage in the dark. *J. Exper. Biol.* **219**:  
768 582-589. doi: 10.1242/jeb.128918.  
769
- 770 Carpenter, S.R., Cole, J.J., Kitchell, J.F. & Pace, M.L. 1998. Impact of Dissolved Organic Carbon,  
771 Phosphorus, and Grazing on Phytoplankton Biomass and Production in Experimental  
772 Lakes. *Limnol. Oceanogr.* **43**(1): 73–80.  
773
- 774 Cole, J. J., Caraco, N.F., Kling, G.W. and Kratz, T.K. 1994. Carbon dioxide supersaturation in the  
775 surface waters of lakes. *Science* **265**: 1568–1570.  
776
- 777 Cobcroft, J. M. and Pankhurst, P. M. 2003. Sensory organ development in cultured striped  
778 trumpeter larvae *Latris lineata*: implications for feeding behaviour. *Mar. Freshw. Res.*  
779 **54**: 669-682.  
780
- 781 Craig, N., Jones, S.E., Weidel, B.C., and Solomon, C.T. 2017. Life history constraints explain  
782 negative relationship between fish productivity and dissolved organic carbon in lakes.  
783 *Ecol. Evol.* **7**(16): 6201–6209. doi:10.1002/ece3. 3108.  
784

- 785 Creed, IF, Bergström, A-K, Trick, C.G., Grimm, N.B., Hessen, D.O., Karlsson, J. ... Weyhenmeyer,  
786 G.A. 2018. Global change-driven effects on dissolved organic matter composition:  
787 Implications for food webs of northern lakes. *Glob. Chan. Biol.* **24**: 3692– 3714.  
788 <https://doi.org/10.1111/gcb.14129>.  
789
- 790 Crowder, L.B., McDonald, M.E., and Rice, J.A. 1987. Understanding recruitment of Lake  
791 Michigan fishes: the importance of size-based interactions between fish and  
792 zooplankton. *Can. J. Fish. Aq. Sci.* **44** (2): 141-147.  
793
- 794 Cummings ME, Endler JA, Rebecca C. Fuller. 2018. 25 Years of sensory drive: the evidence and  
795 its watery bias. *Curr Zool.* 64: 471-484.  
796
- 797 Deslauriers, D., Rosburg, A.J., and Chipps, S.R. 2017. Development of a foraging model  
798 framework to reliably estimate daily food consumption by young fishes *Can. J. Fish. Aq.*  
799 *Sci.* **74**: 1668-1681. <https://doi.org/10.1139/cjfas-2016-0331>.  
800
- 801 de Wit, H.A., Valinia, S., Weyhenmeyer, G.A., Futter, M.N., Kortelainen, P., Austnes, K., Hessen,  
802 D.O., Räike, A., Laudon, H. and Vuorenmaa, H. 2016. Current Browning of Surface  
803 Waters Will Be Further Promoted by Wetter Climate. *Environ. Sci. Tech. Let.* **3** (12): 430-  
804 435. DOI: 10.1021/acs.estlett.6b00396.  
805
- 806 Douglas, R.H. and Djamgoz, M. 1990. *The Visual system of fish*. Chapman and Hall.  
807
- 808 Einem, J. von and Granéli, W. 2010. Effects of fetch and dissolved organic carbon on epilimnion  
809 depth and light climate in small forest lakes in southern Sweden. *Limnol. Oceanogr.* **55**:  
810 920–930.  
811
- 812 Ekvall, M.K. and Hansson L-A. 2012. Differences in Recruitment and Life-History Strategy Alter  
813 Zooplankton Spring Dynamics Under Climate-Change Conditions. *PLoS ONE* **7**(9):  
814 e44614. <https://doi.org/10.1371/journal.pone.0044614>  
815
- 816 Ekvall, M.K., De la Calle M.J., Faassen, E.J., Gustafsson, S., Lüring, M., and Hansson, L-A. 2013.  
817 Synergistic and species-specific effects of climate change and water colour on  
818 cyanobacterial toxicity and bloom formation. *Freshw. Biol.* **58**: 2414–2422.  
819
- 820 Erlandsson, M., Buffam, I., Folster, J., Laudon, H., Temnerud, J., Weyhenmeyer, G.A., and  
821 Bishop, K. 2008. Thirty-five years of synchrony in the organic matter concentrations of  
822 Swedish rivers explained by variation in flow and sulphate. *Global Change Biol.* **14**:  
823 1191–1198.  
824
- 825 Estlander, S., Nurminen, L., Olin, M., Vinni, M., Immonen, S., Rask, M., and Lehtonen, H. 2010.  
826 Diet shifts and food selection of perch *Perca fluviatilis* and roach *Rutilus rutilus* in humic  
827 lakes of varying water colour. *J. Fish Biol.* **77**(1): 241– 256.  
828 <https://doi.org/10.1111/j.1095-8649.2010.02682.x>.

- 829
- 830 Fiksen, Ø., Aksnes, D.L., Flyum, M.H. and Giske, J. 2002. The influence of turbidity on growth  
831 and survival of fish larvae: a numerical analysis. *Hydrobiologia* **484**: 49–59.  
832 <https://doi.org/10.1023/A:1021396719733>  
833
- 834
- 835 Finstad, A. G., Helland, I.P., Ugedal, O., Hesthagen, T., and Hessen, D.O. 2014. Unimodal  
836 response of fish yield to dissolved organic carbon. *Ecol. Let.* **17**: 36–43.  
837
- 838 Fox J, Weisberg S. 2019. *An R Companion to Applied Regression*, Third edition. Sage, Thousand  
839 Oaks CA. <https://socialsciences.mcmaster.ca/jfox/Books/Companion/>.  
840
- 841 Freeman, C., Evans, C.D, Monteith, D.T., Reynolds, B., and Fenner, N. 2001. Export of organic  
842 carbon from peat soils. *Nature* **412**: 785–786. doi:10.1038/35090628.  
843
- 844 Fuiman L.A. 2002. Special considerations of fish eggs and larvae, pp. 1-32. *In* L.A. Fuiman and  
845 G.W. Robert (eds.), *Fishery Science, The unique contributions of early life stages*.  
846 Blackwell publishing, 326 pp.  
847
- 848 Fuiman, L.A. and R.G. Werner, eds. 2002. *Fishery Science: The Unique Contributions of Early*  
849 *Life Stages*. Blackwell Science, Oxford.  
850
- 851 Gall, A., Kainz, M., and Rasconi, S. 2017. *Daphnia magna* fitness during low food supply under  
852 different water temperature and brownification scenarios. *J. Limnol.* **76**: 161-169. DOI:  
853 10.4081/jlimnol.2016.1450.  
854
- 855 Guthrie, D. M. and Muntz, W. R. A. 1993. Role of vision in fish behavior. *In* *Behavior of Teleost*  
856 *Fishes*, 2nd edn (ed Pitcher, T. P.), pp. 89-121. London: Chapman and Hall.  
857
- 858 Haaland, S., Hongve, D., Laudon, H., Riise, G., and Vogt, R.D. 2010. Quantifying the drivers of the  
859 increasing colored organic matter in boreal surface waters. *Environ. Sci. Tech.* **44**: 2975–  
860 2980.  
861
- 862 Hansson, L-A., Nicolle, A., Brodersen, J., Romare, P., Anders Nilsson, P., Brönmark, C., & Skov, C.  
863 2007. Consequences of fish predation, migration and juvenile ontogeny on zooplankton  
864 spring dynamics. *Limnol. Oceanogr.* **52**: 696–706.  
865
- 866 Houde, E.D. and Zastrow, C.E. 1993, Ecosystem- and taxon-specific dynamic and energetics  
867 properties of larval fish assemblages. *Bulletin of Marine Science* **53**: 290-335.  
868
- 869 Horppila, J., Olin, M., Vinni, M., Estlander, S., Nurminen, L., Rask, M., Ruuhijärvi, J. and  
870 Lehtonen, H. 2010. Perch production in forest lakes: the contribution of abiotic and  
871 biotic factors. *Ecol. Freshw. Fish* **19**: 257-266.  
872

- 873 Jones, R.I. 1992. The influence of humic substances on lacustrine planktonic food chains.  
874 *Hydrobiolog.* **229**: 73–91.  
875
- 876 Jones, W. R. and Janssen, J. 1992. Lateral line development and feeding behavior in the mottled  
877 sculpin, *Cottus bairdi* (Scorpaeniformes: Cottidae). *Copeia* **1992**: 485-492.  
878
- 879 Kassambara, A. 2020. Rstatix: Pipe-Friendly framework for basic statistical tests.  
880 <https://rpkgs.datanovia.com/rstatix/>  
881
- 882 Karlsson, J., Byström, P., Ask, J., Ask, P., Persson, L. and Jansson, M. 2009. Light limitation of  
883 nutrient-poor lake ecosystems. *Nature* **460**(7254): 506–509.  
884
- 885 Karlsson, J., Bergstrom, A.K., Bystrom, P., Gudasz, C., Rodriguez, P., and Hein, C. 2015.  
886 Terrestrial organic matter input suppresses biomass production in lake ecosystems.  
887 *Ecology* **96**: 2870– 2876. doi:10.1890/15-0515.1.  
888
- 889 Keast, A., and Welsh L. 1968. Daily feeding periodicities, food uptake rates, and dietary changes  
890 with hour of day in some lake fishes. *J. Fish. Res. Board. Can.* **25**: 1133-1144.  
891
- 892 Kilham, S.S., Kreeger, D.A., Lynn, S.G., Goulden, C.E., and Herrera, L. 1998. COMBO: a defined  
893 freshwater culture medium for algae and zooplankton. *Hydrobiolog.* **377**: 147-159.  
894
- 895 Kirk, J.T. O. 1994. Light and photosynthesis in aquatic ecosystems. Melbourne: Cambridge  
896 University Press. <http://www.loc.gov/catdir/toc/cam025/93037395.html>  
897
- 898 Koizumi S., Craig, N., Zwart, J.A., Kelly, P.T., Ziegler, J.P., Weidel, B.C., Jones, S.E., & Solomon,  
899 C.T. 2018. Experimental whole-lake dissolved organic carbon increase alters fish diet and  
900 density but not growth or productivity. *Can. J. Fish. Aq. Sci.* **75**: 1859-1867.  
901 <https://doi.org/10.1139/cjfas-2017-0283>.  
902
- 903 Kritzberg, E.S. and Ekström, S.M. 2012. Increasing iron concentrations in surface waters – a  
904 factor behind brownification? *Biogeosciences* **9**(4): 1465–1478.  
905
- 906 Le Bret, K., Langenheder, S., Colinas, N., Östman, Ö., & Lindström, E.S. 2018. Increased water  
907 colour affects freshwater plankton communities in a mesocosm study. *Aq. Microb. Ecol.*  
908 **81**: 1–17. <https://doi.org/10.3354/ame01858>  
909
- 910 Lechowicz, M.J. 1982. The sampling characteristics of electivity indices. *Oecologia* **52**: 22–30.  
911
- 912 Leech, D.M. and Johnsen, S. 2009. Light and biological receptors. *In* Encyclopedia of Inland  
913 Waters. Editor, G. Likens. Pp. 671-681.  
914

- 915 Leech, D.M., Pollard, A.I., Labou, S.G., and Hampton, S.E. 2018. Fewer blue lakes and more  
916 murky lakes in the U.S.: Implications for planktonic food webs. *Limnol. Oceanogr.* **63**:  
917 2661-2680. doi.org/10.1002/lno.10967.  
918
- 919 Lenth, R.V. 2016. Least-Squares Means: The R Package lsmeans. *Journal of Statistical Software*,  
920 69(1), 1-33.doi:10.18637/jss.v069.i01  
921
- 922 Mangiafico, S. 2020. Rcompanion: Functions to Support Extension Education Program  
923 Evaluation. <http://rcompanion.org>  
924
- 925 Mehner, T. and Thiel, R. 1999. A review of predation impact by 0+ fish on zooplankton in fresh  
926 and brackish waters of the temperate northern hemisphere. *Environ. Biol. Fish.* **56**:  
927 169–181.  
928
- 929 Mills, E. L., Sherman, R. and Robson, D.S. 1989. Effect of zooplankton abundance and body size  
930 on growth of age-0 yellow perch (*Perca flavescens*) in Oneida Lake, New York, 1975-  
931 1986. *Can. J. Fish. Aquat. Sci.* **46**: 880- 886.  
932
- 933 Miner, J.G., and R.A. Stein. 1993. Interactive influence of turbidity and light on larval bluegill  
934 (*Lepomis macrochirus*) foraging. *Can. j. Fish. Aquat. Sci.* **50**: 704-788.  
935  
936
- 937 Monteith, D.T., Stoddard, J.L., Evans, C.D., de Wit, Heleen A., Forsius, M., Høgåsen, T., Wilander,  
938 A., Skjelkvåle, B.L., Jeffries, D.S., Vuorenmaa, J., Keller, B., Kopáček, J. and Vesely, J.  
939 2007. Dissolved organic carbon trends resulting from changes in atmospheric deposition  
940 chemistry. *Nature* **450**(7169): 537–540.  
941
- 942 Morris D.P., Zagarese, H., Williamson, C.E., Balseiro, E.G., Hargreaves, B.R., Modenutti, B.,  
943 Moeller, R., and Queimalinos, C. 1995. The attenuation of solar UV radiation in lakes and  
944 the role of dissolved organic carbon. *Limnol. Oceanogr.* **40**: 1381–1391.  
945
- 946 Nicolle, A., Hallgren P., Von Einem J., Kritzberg E.S., Graneli W., Persson A. ... Hansson, L-A.  
947 2012. Predicted warming and browning affect timing and magnitude of plankton  
948 phenological events in lakes: an enclosure study. *Freshw. Biol.* **57**: 684–695.  
949
- 950 Nurminen, L, Estlander S, Olin M, and Lehtonen H. 2014. Feeding efficiency of planktivores  
951 under disturbance, the effect of water colour, predation threat and shoal composition:  
952 feeding of planktivores under disturbance. *J. Fish Biol.* **84**: 1195–1201.  
953
- 954 Övergaard, R. 2019. The effects of different browning agents SuperHume, HuminFeed, and  
955 Reverse Osmosis Concentrate on the fitness and survival of *Daphnia magna*  
956 (Dissertation). Retrieved from <http://urn.kb.se/resolve?urn=urn:nbn:se:uu:diva-392705>  
957

- 958 Pinheiro J, Bates D, DebRoy S, Sarkar D, R Core Team (2020). *nlme: Linear and Nonlinear Mixed*  
959 *Effects Models*. R package version 3.1-149. <https://CRAN.R-project.org/package=nlme>.  
960
- 961 Porter, K.G. and Feig, Y. S. 1980. The use of DAPI for identifying and counting aquatic  
962 microflora. *Limnol. Oceanogr.* **25**: doi: 10.4319/lo.1980.25.5.0943.  
963
- 964 R Core Team. 2018. R: A language and environment for statistical computing. R Foundation for  
965 Statistical Computing, Vienna, Austria. URL <https://www.R-project.org/>.  
966
- 967 Ranåker L, Jönsson M, Nilsson PA, and Brönmark C. 2012. Effects of brown and turbid water on  
968 piscivore–prey fish interactions along a visibility gradient. *Freshw. Biol.* **57**(9): 1761-  
969 1768.  
970
- 971 Sampson, J.A., Duston, J., and Croll, R.P. 2013. Superficial neuromasts facilitate non-visual  
972 feeding by larval striped bass (*Morone saxatilis*). *J. Exper. Biol.* **216**: 3522-3530. doi:  
973 10.1242/jeb.087395.  
974
- 975 Santucci, V.J., Jr., and Wahl, D.H. 2003. The effects of growth, predation, and first-winter  
976 mortality on recruitment of bluegill cohorts. *Trans. Amer. Fish. Soc.* **132**: 346-360.  
977
- 978 Seekell, D. A., Lapierre, J.-F., Ask, J., Bergström, A.-K., Deining, A., Rodríguez, P., & Karlsson, J.  
979 2015. The influence of dissolved organic carbon on primary production in northern  
980 lakes. *Limnol. Oceanogr.* **60**: 1276–1285. doi:10.1002/lno.10096.  
981
- 982 Seekell, D. A., Byström, P. and Karlsson, J. 2018. Lake morphometry moderates the relationship  
983 between water color and fish biomass in small boreal lakes. *Limnol. Oceanogr.* **63**: 2171-  
984 2178. doi:10.1002/lno.10931  
985
- 986 Shoup, D.E., Boswell, K.M. and Wahl, D.H. 2014. Diel Littoral–Pelagic Movements by Juvenile  
987 Bluegills in a Small Lake. *Trans. Amer. Fish. Soc.* **143**(3): 796-801.
- 988 Solomon, C. T., S. E. Jones, B. C. Weidel, and others. 2015. Ecosystem Consequences of  
989 Changing Inputs of Terrestrial Dissolved Organic Matter to Lakes: Current Knowledge  
990 and Future Challenges. *Ecosystems* 18: 376–389. doi:10.1007/s10021-015-9848-y  
991
- 992 Stasko, A.D., Gunn, J.M., and Johnston, T.A. 2012. Role of ambient light in structuring north  
993 temperate fish communities: potential effects of increasing dissolved organic carbon  
994 concentration with a changing climate. *Environ. Rev.* **20**(3): 173-190. doi:10.1139/a2012-  
995 010.
- 996 Stasko AD, Johnston TA, and Gunn JM. 2015. Effects of water clarity and other environmental  
997 factors on trophic niches of two sympatric piscivores. *Freshw. Biol.* **60**: 1459–1474.  
998
- 999 Taipale, S. J., Kahilainen, K. K., Holtgrieve, G. W., and Peltomaa, E. T. 2018. Simulated  
1000 eutrophication and browning alters zooplankton nutritional quality and determines  
1001 juvenile fish growth and survival. *Ecol. Evol.* **8**(5): 2671–2687. doi:10.1002/ece3.3832.

- 1002  
1003 Tang, Y., Yang, X., Xu, R., Zhang, X., Liu, Z., Zhang, Y. and Dumont, H. J. 2019. Heterotrophic  
1004 microbes upgrade food value of a terrestrial carbon resource for *Daphnia magna*. *Limnol.*  
1005 *Oceanogr.* 64: 474-482. doi:10.1002/lno.11052.  
1006
- 1007 Thrane, J.-E., Hessen, D.O. and Andersen, T. 2014. The Absorption of Light in Lakes: Negative  
1008 Impact of Dissolved Organic Carbon on Primary Productivity. *Ecosystems* 17: 1040–1052.  
1009
- 1010 van Dorst, R.M., Gårdmark, A., Svanbäck, R., Beier, U., Weyhenmeyer, G.A., and Huss, M. 2019.  
1011 Warmer and browner waters decrease fish biomass production. *Global Change Biol.* 25:  
1012 1395– 1408. <https://doi.org/10.1111/gcb.14551>.  
1013
- 1014 Vasconcelos, F.R., Diehl, S., Rodríguez, P., Karlsson, J., and Byström, P. 2018. Effects of  
1015 terrestrial organic matter on aquatic primary production as mediated by pelagic–benthic  
1016 resource fluxes. *Ecosystems* 21: 1255. <https://doi.org/10.1007/s10021-017-0217-x>.  
1017
- 1018 Vasconcelos, FR, Diehl, S, Rodríguez, P, Hedström, P, Karlsson, J, and Byström, P. 2019. Bottom-  
1019 up and top-down effects of browning and warming on shallow lake food webs. *Global*  
1020 *Change Biol.* 25: 504– 521. <https://doi.org/10.1111/gcb.14521>.  
1021
- 1022 Watkins, J., Rudstam, L., and Holeck, K. 2011. Length-weight regressions for zooplankton  
1023 biomass calculations – A review and a suggestion for standard equations. Technical  
1024 Report. Cornell University. Available at <https://hdl.handle.net/1813/24566>.  
1025
- 1026 Weidel, B.C., Baglini, K., Jones, S.E., Kelly, P.T., Solomon, C.T., and Zwart, J.A. 2017. Light climate  
1027 and dissolved organic carbon concentration influence species-specific changes in fish  
1028 zooplanktivory. *Inland Waters* 7(2): 210-217. doi:10.1080/20442041.2017.1329121.  
1029
- 1030 Werner, R.G. 1969. Ecology of Limnetic Bluegill (*Lepomis macrochirus*) Fry in Crane Lake,  
1031 Indiana. *The American Midland Naturalist* 81(1): 164-181.
- 1032 Wetzel, R. G. 2001. *Limnology: Lake and river ecosystems*, 3rd ed. Academic Press.  
1033
- 1034 Weyhenmeyer, G.A., Müller, R.A., Norman, M., and Tranvik, L.J. 2016. Sensitivity of freshwaters  
1035 to browning in response to future climate change. *Climatic Change* 134: 225-239.  
1036 <https://doi.org/10.1007/s10584-015-1514-z>.  
1037
- 1038 Williamson, C. E., Overholt, E.P., Pilla, R.M., Leach, T.H., Brentrup, J.A., Knoll, L.B., Mette, E.M.  
1039 and Moeller, R.E. 2015. Ecological consequences of long-term browning in lakes.  
1040 *Scientific Reports* 5: srep18666. doi:10.1038/srep18666.  
1041
- 1042 Wylie, J.L. and Currie, D.J. 1991. The relative importance of bacteria and algae as food sources  
1043 for crustacean zooplankton. *Limnol. Oceanogr.* 36: 708-728. doi:  
1044 10.4319/lo.1991.36.4.0708.  
1045



1046 **Table 1.** Mean  $\pm$  S.E. of major physical and chemical parameters across water color treatments.  
 1047 Significance is denoted in the last column, with, T = treatment effect, D = Day, I = Treatment:Day  
 1048 interaction, and NS = not significant. Lowercase letters indicate which treatments were  
 1049 significantly different from one another based on treatment effect.  
 1050

|                         | Lake Water             | Light Brown           | Moderate Brown       | Dark Brown           | Significance                           |
|-------------------------|------------------------|-----------------------|----------------------|----------------------|----------------------------------------|
| Temperature (°C)        | 22.1 $\pm$ 0.18        | 22.09 $\pm$ 0.16      | 22.04 $\pm$ 0.16     | 22.03 $\pm$ 0.15     | (T) NS<br>(D) NS<br>(I) NS             |
| Dissolved Oxygen (mg/L) | 9.05 $\pm$ 0.09        | 9.12 $\pm$ 0.09       | 8.89 $\pm$ 0.04      | 8.83 $\pm$ 0.03      | (T) NS<br>(D) <0.0001<br>(I) NS        |
| Conductivity (mS/cm)    | 0.08 $\pm$ 0<br>a      | 0.25 $\pm$ 0.01<br>b  | 0.25 $\pm$ 0<br>b    | 0.25 $\pm$ 0.01<br>b | (T) <0.0001<br>(D) 0.01<br>(I) NS      |
| pH                      | 7.36 $\pm$ 0.04        | 7.25 $\pm$ 0.04       | 7.15 $\pm$ 0.22      | 7.14 $\pm$ 0.02      | (T) NS<br>(D) NS<br>(I) NS             |
| a440                    | 1.77 $\pm$ 0.65<br>a   | 0.99 $\pm$ 0.08<br>a  | 4.84 $\pm$ 0.12<br>b | 9.83 $\pm$ 0.17<br>c | (T) <0.0001<br>(D) 0.003<br>(I) NS     |
| Chl- <i>a</i> (ug/L)    | 16.34 $\pm$ 2.69<br>ab | 29.65 $\pm$ 3.83<br>b | 12.4 $\pm$ 2.12<br>a | 8.66 $\pm$ 1.57<br>a | (T) <0.0001<br>(D) 0.004<br>(I) 0.0002 |
| DOC (mg/L)              | 5.22 $\pm$ 0.05<br>a   | 2.58 $\pm$ 0.07<br>b  | 3.40 $\pm$ 0.06<br>c | 4.66 $\pm$ 0.07<br>d | (T) <0.0001<br>(D) 0.02<br>(I) NS      |

1051  
 1052  
 1053  
 1054  
 1055  
 1056  
 1057  
 1058

1059 **Table 2.** Results from the three foraging experiments with larval bluegill (*Lepomis macrochirus*), including the  
 1060 mean  $\pm$  S.E. consumption rates. The approximate total number of each zooplankton type in the tanks at the start  
 1061 of a feeding trial is provided in parentheses in the first column. Welch's ANOVA results and omega-squared  
 1062 estimates of effect size were calculated for total zooplankton consumed only.  
 1063

|                                                                | Consumption Rates<br>(day <sup>-1</sup> larva <sup>-1</sup> or min <sup>-1</sup> larva <sup>-1</sup> ) |                |                |
|----------------------------------------------------------------|--------------------------------------------------------------------------------------------------------|----------------|----------------|
|                                                                | Light                                                                                                  | Moderate       | Dark           |
| <b>Experiment 1: 24 hours, ~130 zooplankton L<sup>-1</sup></b> |                                                                                                        |                |                |
| Large Cladocerans (210)                                        | 99 $\pm$ 4                                                                                             | 101 $\pm$ 2    | 102 $\pm$ 1    |
| Small Cladocerans (1817)                                       | 884 $\pm$ 7                                                                                            | 876 $\pm$ 8    | 876 $\pm$ 11   |
| <i>Chaoborus</i> (33)                                          | 23 $\pm$ 0                                                                                             | 23 $\pm$ 0     | 23 $\pm$ 0     |
| Copepods (47)                                                  | 16 $\pm$ 0.1                                                                                           | 16 $\pm$ 0.2   | 16 $\pm$ 0.2   |
| Rotifers (77)                                                  | 33 $\pm$ 1                                                                                             | 34 $\pm$ 1     | 35 $\pm$ 0.1   |
| Total (2183)                                                   | 1055 $\pm$ 6                                                                                           | 1051 $\pm$ 9   | 1052 $\pm$ 10  |
| Welch's ANOVA                                                  | F <sub>(2, 5.7)</sub> = 0.081, p = 0.92, n = 12                                                        |                |                |
| Omega Squared Estimate                                         | est $\omega^2$ = 0.18: 95% CI [0.0, 0.68]                                                              |                |                |
| <b>Experiment 2: 10 minutes, ~4 zooplankton L<sup>-1</sup></b> |                                                                                                        |                |                |
| Large Cladocerans (39)                                         | 2 $\pm$ 0.03                                                                                           | 2 $\pm$ 0.1    | 2 $\pm$ 0.03   |
| <i>Chaoborus</i> (5)                                           | 0.3 $\pm$ 0                                                                                            | 0.3 $\pm$ 0    | 0.25 $\pm$ 0   |
| Copepods (23)                                                  | 1 $\pm$ 0.02                                                                                           | 1 $\pm$ 0.04   | 0.8 $\pm$ 0.1  |
| Total (67)                                                     | 3 $\pm$ 0.01                                                                                           | 3 $\pm$ 0.2    | 2.8 $\pm$ 0.4  |
| Welch's ANOVA                                                  | F <sub>(2, 4.0)</sub> = 1.53, p = 0.32, n = 12                                                         |                |                |
| Omega Squared Estimate                                         | est $\omega^2$ = 0.08: 95% CI [0.0, 0.47]                                                              |                |                |
| <b>Experiment 3: 5 minutes, ~2 zooplankton L<sup>-1</sup></b>  |                                                                                                        |                |                |
| Large Cladocerans (22)                                         | 1.3 $\pm$ 0.2                                                                                          | 1.5 $\pm$ 0.08 | 1.4 $\pm$ 0.2  |
| Small Cladoceran (7)                                           | 0.3 $\pm$ 0.1                                                                                          | 0.5 $\pm$ 0.1  | 0.38 $\pm$ 0.1 |
| Copepods (11)                                                  | 0.5 $\pm$ 0.2                                                                                          | 0.7 $\pm$ 0.2  | 0.5 $\pm$ 0.1  |
| Total (40)                                                     | 2 $\pm$ 0.3                                                                                            | 2 $\pm$ 0.2    | 2 $\pm$ 0.5    |
| Welch's ANOVA                                                  | F <sub>(2, 5.3)</sub> = 1.45, p = 0.31, n = 12                                                         |                |                |
| Omega Squared Estimate                                         | est $\omega^2$ = 0.08: 95% CI [0.0, 0.43]                                                              |                |                |

1064 **Table 3.** E\* Index values from the three foraging experiments with larval bluegill (*Lepomis*  
 1065 *machrochirus*), including the mean  $\pm$  S.E. for prey selectivity. The E\* Index ranges from 1 to -1,  
 1066 where 1 represents a strong selection for a prey type, -1 equals strong avoidance of a prey type,  
 1067 and 0 equals random feeding. Two-way ANOVAs were performed to assess significant  
 1068 differences with treatment, zooplankton taxa, and their interaction.

|                                                                                                                                                                                                                       | E* Index          |                   |                   |
|-----------------------------------------------------------------------------------------------------------------------------------------------------------------------------------------------------------------------|-------------------|-------------------|-------------------|
|                                                                                                                                                                                                                       | Light             | Moderate          | Dark              |
| <b>Experiment 1: 24 hours, ~130 zooplankton L<sup>-1</sup></b>                                                                                                                                                        |                   |                   |                   |
| Large Cladocerans                                                                                                                                                                                                     | -0.007 $\pm$ 0.02 | 0.004 $\pm$ 0.004 | 0.007 $\pm$ 0.006 |
| Small Cladocerans                                                                                                                                                                                                     | 0.01 $\pm$ 0.005  | 0.003 $\pm$ 0.005 | 0.003 $\pm$ 0.005 |
| <i>Chaoborus</i>                                                                                                                                                                                                      | 0.02 $\pm$ 0.002  | 0.02 $\pm$ 0.005  | 0.02 $\pm$ 0.002  |
| Copepods                                                                                                                                                                                                              | 0.01 $\pm$ 0.003  | 0.006 $\pm$ 0.003 | -0.01 $\pm$ 0.005 |
| Rotifers                                                                                                                                                                                                              | -0.04 $\pm$ 0.02  | -0.04 $\pm$ 0.01  | -0.03 $\pm$ 0.004 |
| ANOVA Results: Treatment: $F_{(2,45)} = 0.09$ ; $p = 0.91$ , $n = 12$<br>Zooplankton Taxa: $F_{(2,45)} = 20.62$ ; $p < 0.0001$ , $n = 12$<br>Treatment:Zooplankton: Taxa: $F_{(8,45)} = 0.84$ ; $p = 0.57$ , $n = 12$ |                   |                   |                   |
| <b>Experiment 2: 10 minutes, ~4 zooplankton L<sup>-1</sup></b>                                                                                                                                                        |                   |                   |                   |
| Large Cladocerans                                                                                                                                                                                                     | 0.004 $\pm$ 0.008 | 0.006 $\pm$ 0.02  | -0.03 $\pm$ 0.06  |
| <i>Chaoborus</i>                                                                                                                                                                                                      | 0.01 $\pm$ 0.002  | 0.04 $\pm$ 0.02   | 0.06 $\pm$ 0.06   |
| Copepods                                                                                                                                                                                                              | -0.02 $\pm$ 0.009 | -0.05 $\pm$ 0.007 | -0.06 $\pm$ 0.03  |
| ANOVA Results: Treatment: $F_{(2,27)} = 0.10$ ; $p = 0.91$ , $n = 12$<br>Zooplankton Taxa: $F_{(2,27)} = 4.81$ ; $p = 0.02$ , $n = 12$<br>Treatment:Zooplankton: Taxa: $F_{(4,27)} = 0.72$ ; $p = 0.58$ , $n = 12$    |                   |                   |                   |
| <b>Experiment 3: 5 minutes, ~2 zooplankton L<sup>-1</sup></b>                                                                                                                                                         |                   |                   |                   |
| Large Cladocerans                                                                                                                                                                                                     | 0.16 $\pm$ 0.07   | -0.01 $\pm$ 0.07  | 0.10 $\pm$ 0.06   |
| Small Cladocerans                                                                                                                                                                                                     | -0.23 $\pm$ 0.26  | -0.05 $\pm$ 0.08  | -0.2 $\pm$ 0.3    |
| Copepods                                                                                                                                                                                                              | -0.25 $\pm$ 0.29  | -0.02 $\pm$ 0.03  | -0.08 $\pm$ 0.07  |
| ANOVA Results: Treatment: $F_{(2,27)} = 0.15$ ; $p = 0.86$ , $n = 12$<br>Zooplankton Taxa: $F_{(2,27)} = 1.96$ ; $p = 0.17$ , $n = 12$<br>Treatment:Zooplankton: Taxa: $F_{(4,27)} = 0.48$ ; $p = 0.75$ , $n = 12$    |                   |                   |                   |

1069 **Figure Legends**

1070

1071 **Figure 1.** Spectral characteristics of the four treatments measured in photon counts per  
1072 wavelength. Data were collected by an Ocean Optics Red Tide USB650 UV spectrophotometer  
1073 from 250 to 800 nm with the sensor placed at the bottom of the tank pointing straight up  
1074 toward the overhead grow lamps.

1075

1076 **Figure 2.** Mean phytoplankton biomass, as estimated by chlorophyll-*a* concentration, in the  
1077 four treatments during the 28-day experiment. Error bars represent the standard error of three  
1078 replicate tanks per treatment. Phytoplankton biomass increased in all treatments during the  
1079 first 7 days but was comparatively lower in treatments with increased water color throughout  
1080 the experiment.

1081

1082 **Figure 3.** Zooplankton densities (individuals per Liter) in the four treatments during the 28-day  
1083 experiment. Error bars represent the standard error of three replicate tanks per treatment. The  
1084 top panel displays changes in total zooplankton densities (A) while the bottom panels display  
1085 individual zooplankton genera or groups, including the cladocerans *Bosmina* (B) and *Daphnia*  
1086 (C) as well as cyclopoid (D) and calanoid (E) copepods. In general, the zooplankton community  
1087 shifted from copepod to cladoceran dominated and abundance was significantly lower in  
1088 treatments with increased water color.

1089

1090 **Figure 4.** Flocculant organic matter was observed in the guts of cladocerans, including *Bosmina*  
1091 and *Daphnia*, but not copepods in the moderate and dark brown treatments. Brown arrows  
1092 highlight cladoceran gut contents. Image taken at 40x magnification.

1093

1094 **Figure 5.** Daily prey consumption (A) and total growth over 6 days (B) in relation to zooplankton  
1095 prey availability at the time fish were introduced to the experimental tanks. Note that there are  
1096 2 points for the moderate brown treatment with ~1400 zooplankton prey and 0 mm growth.  
1097 After 6-days, surviving larval fish in the moderate and dark brown treatments displayed  
1098 concave empty stomachs while those in the light brown and lake water treatments had full  
1099 stomachs. Photos show example larvae from the light brown and dark brown treatments (C).  
1100 Red tick marks below fish are in millimeters.

1101

1102 **Figure 6.** Zooplankton consumption rates for larval largemouth bass with increasing water  
1103 color, as measured by absorbance at 440 nm. When given equal prey concentrations in all  
1104 treatments (i.e., 20 individuals per liter), there was no significant difference in the number of  
1105 prey consumed during the 30-minute feeding trial. This suggests no direct effect of browning  
1106 on visual foraging.

1107

1108

1109

1110

1111

1112

1113

1114 **Supplementary Materials**

1115

1116 **Figure S1.** Representative downwelling irradiance curves for photosynthetically active radiation  
1117 (PAR) in Sandy River Reservoir and Hart Pond. Both are located near Farmville, VA, USA and  
1118 were used as our study systems to collect larval fish and zooplankton. Measurements were  
1119 taken with a Biospherical Instruments, Inc. BIC profiling radiometer in June 2014.

1120

1121 **Figure S2.** Mean  $\pm$  S.E. of (A)  $a_{440}$  and (B) dissolved organic carbon concentrations over time  
1122 during the Indirect Effects experiment. Data were collected at Day 0, 3, 7, 14, 21, and 28 as  
1123 described in the Methods.

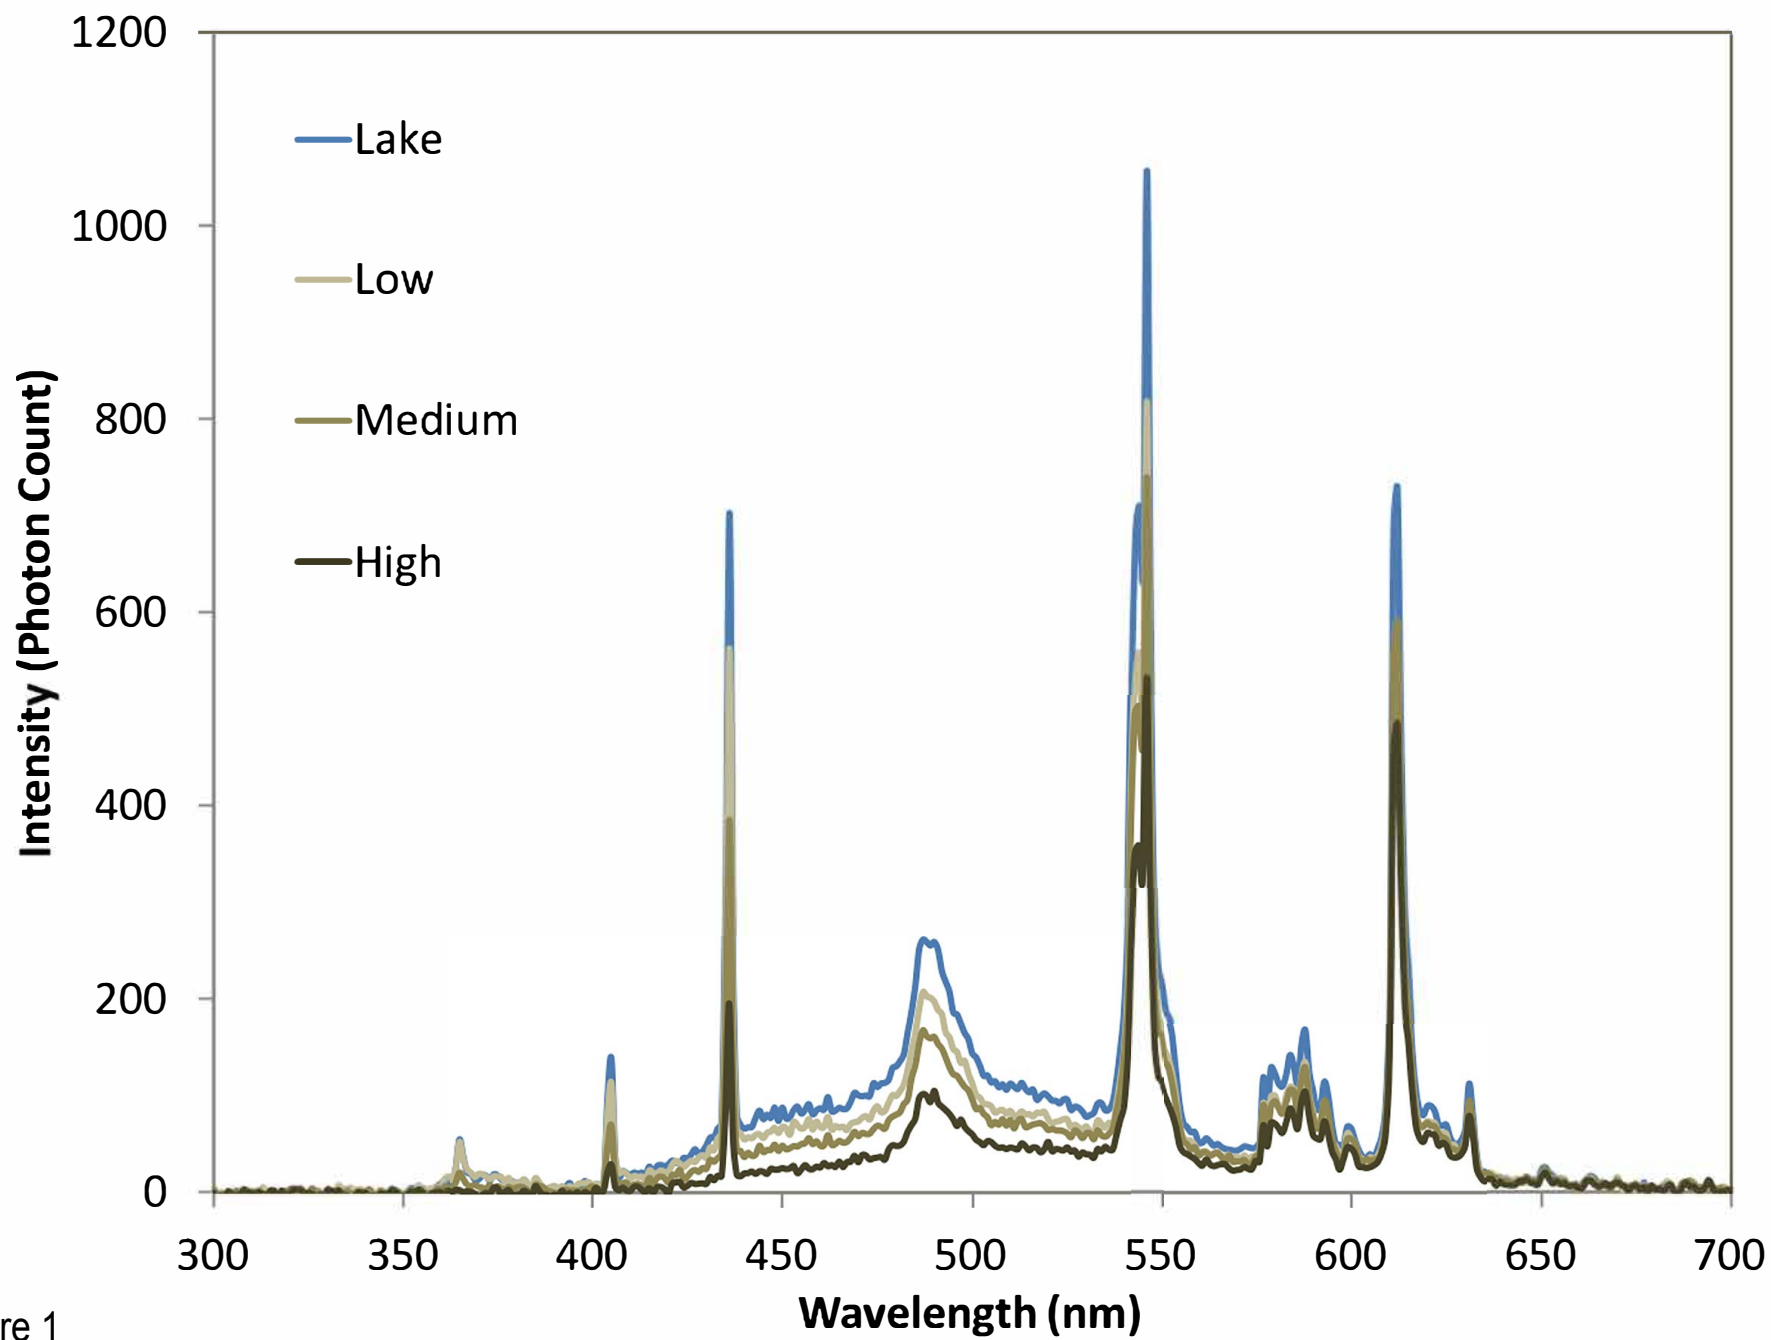

Figure 1

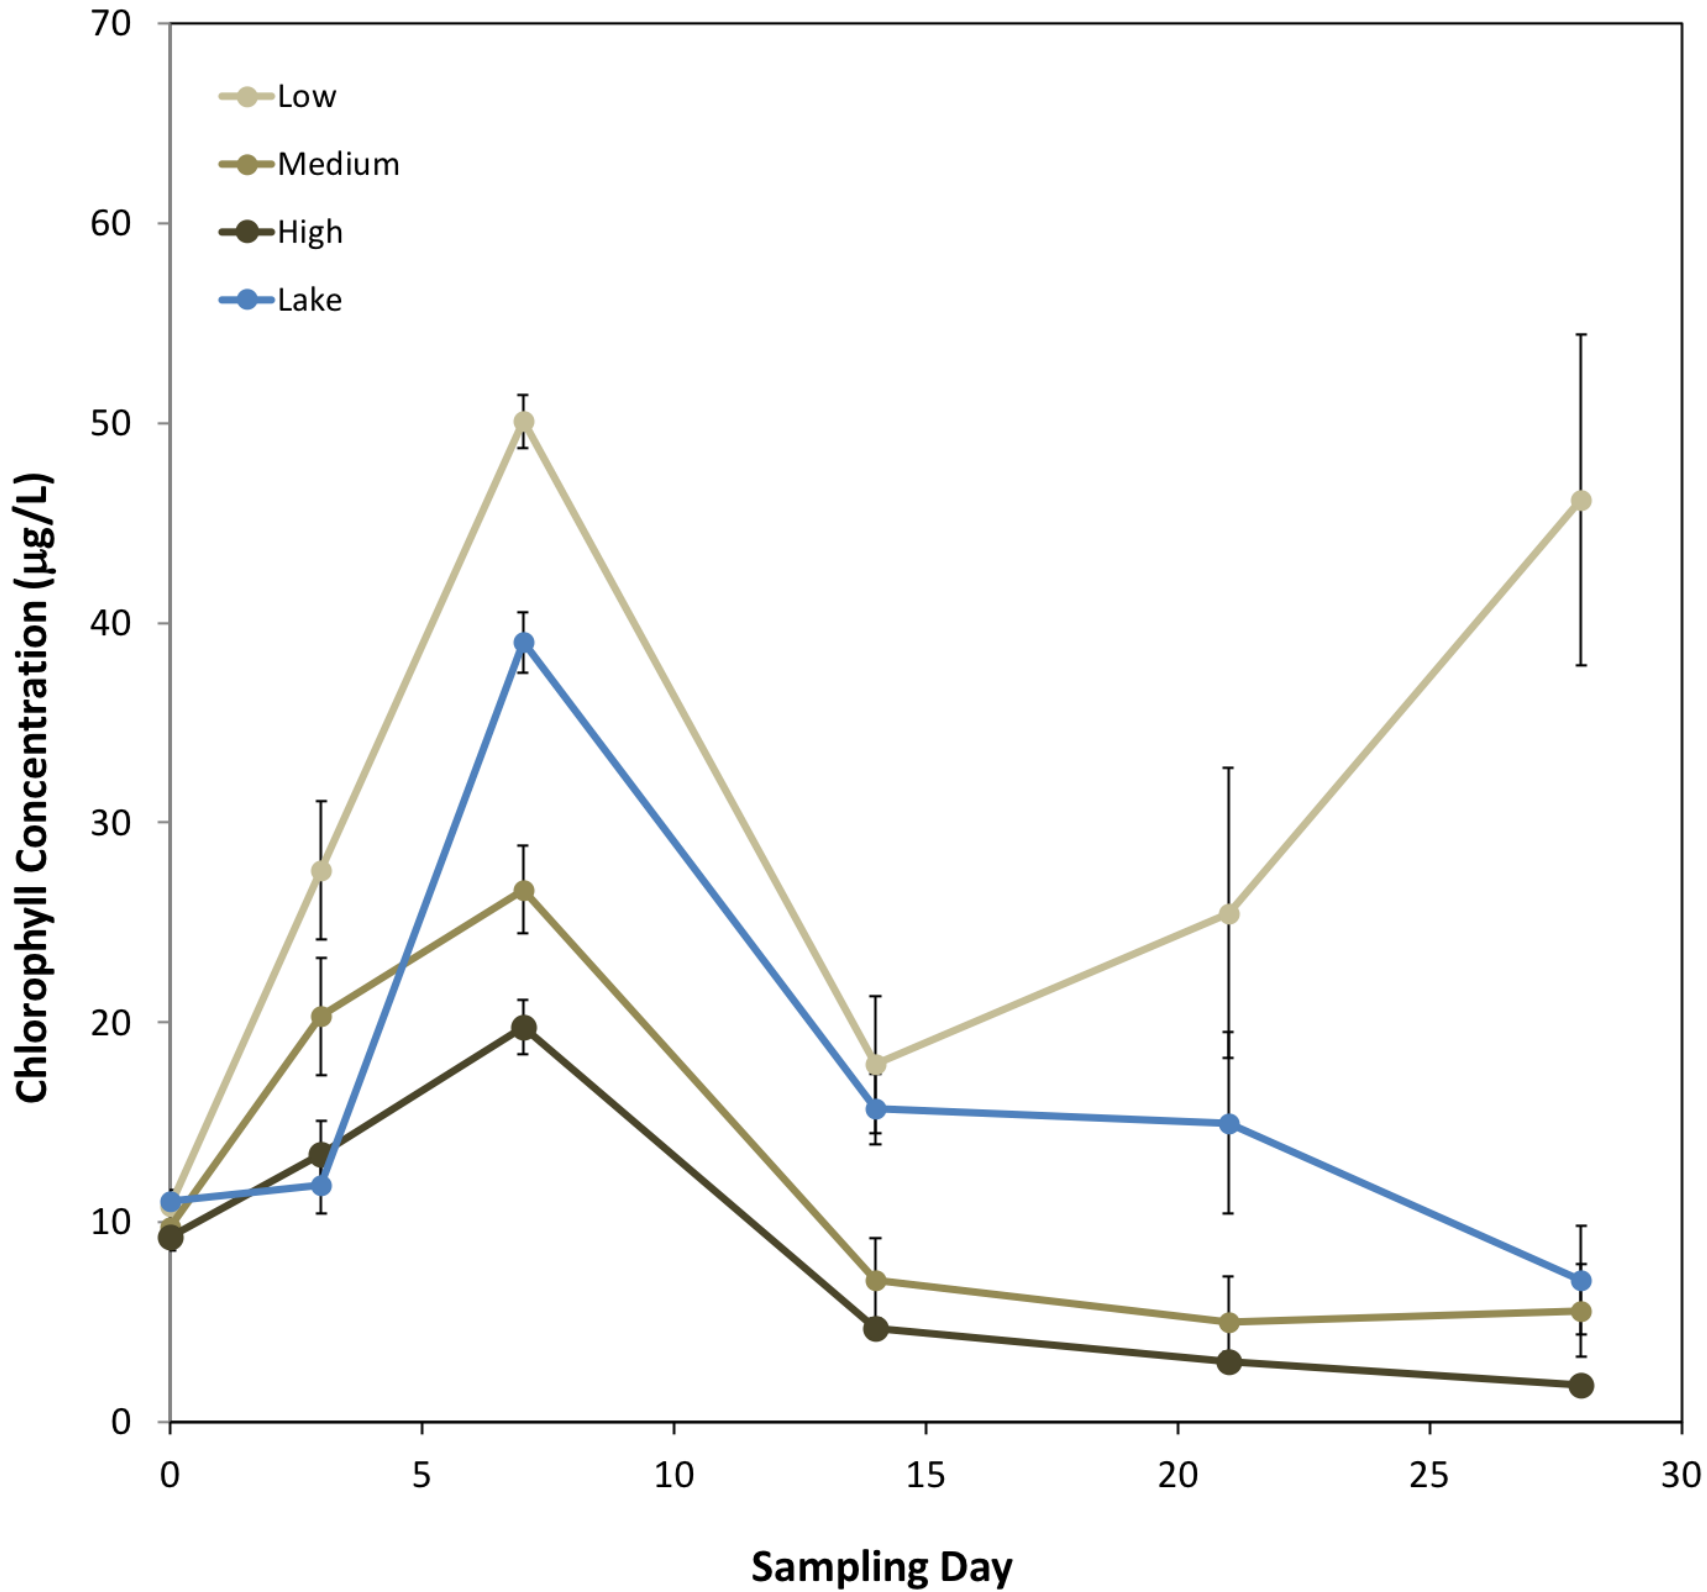

Figure 2

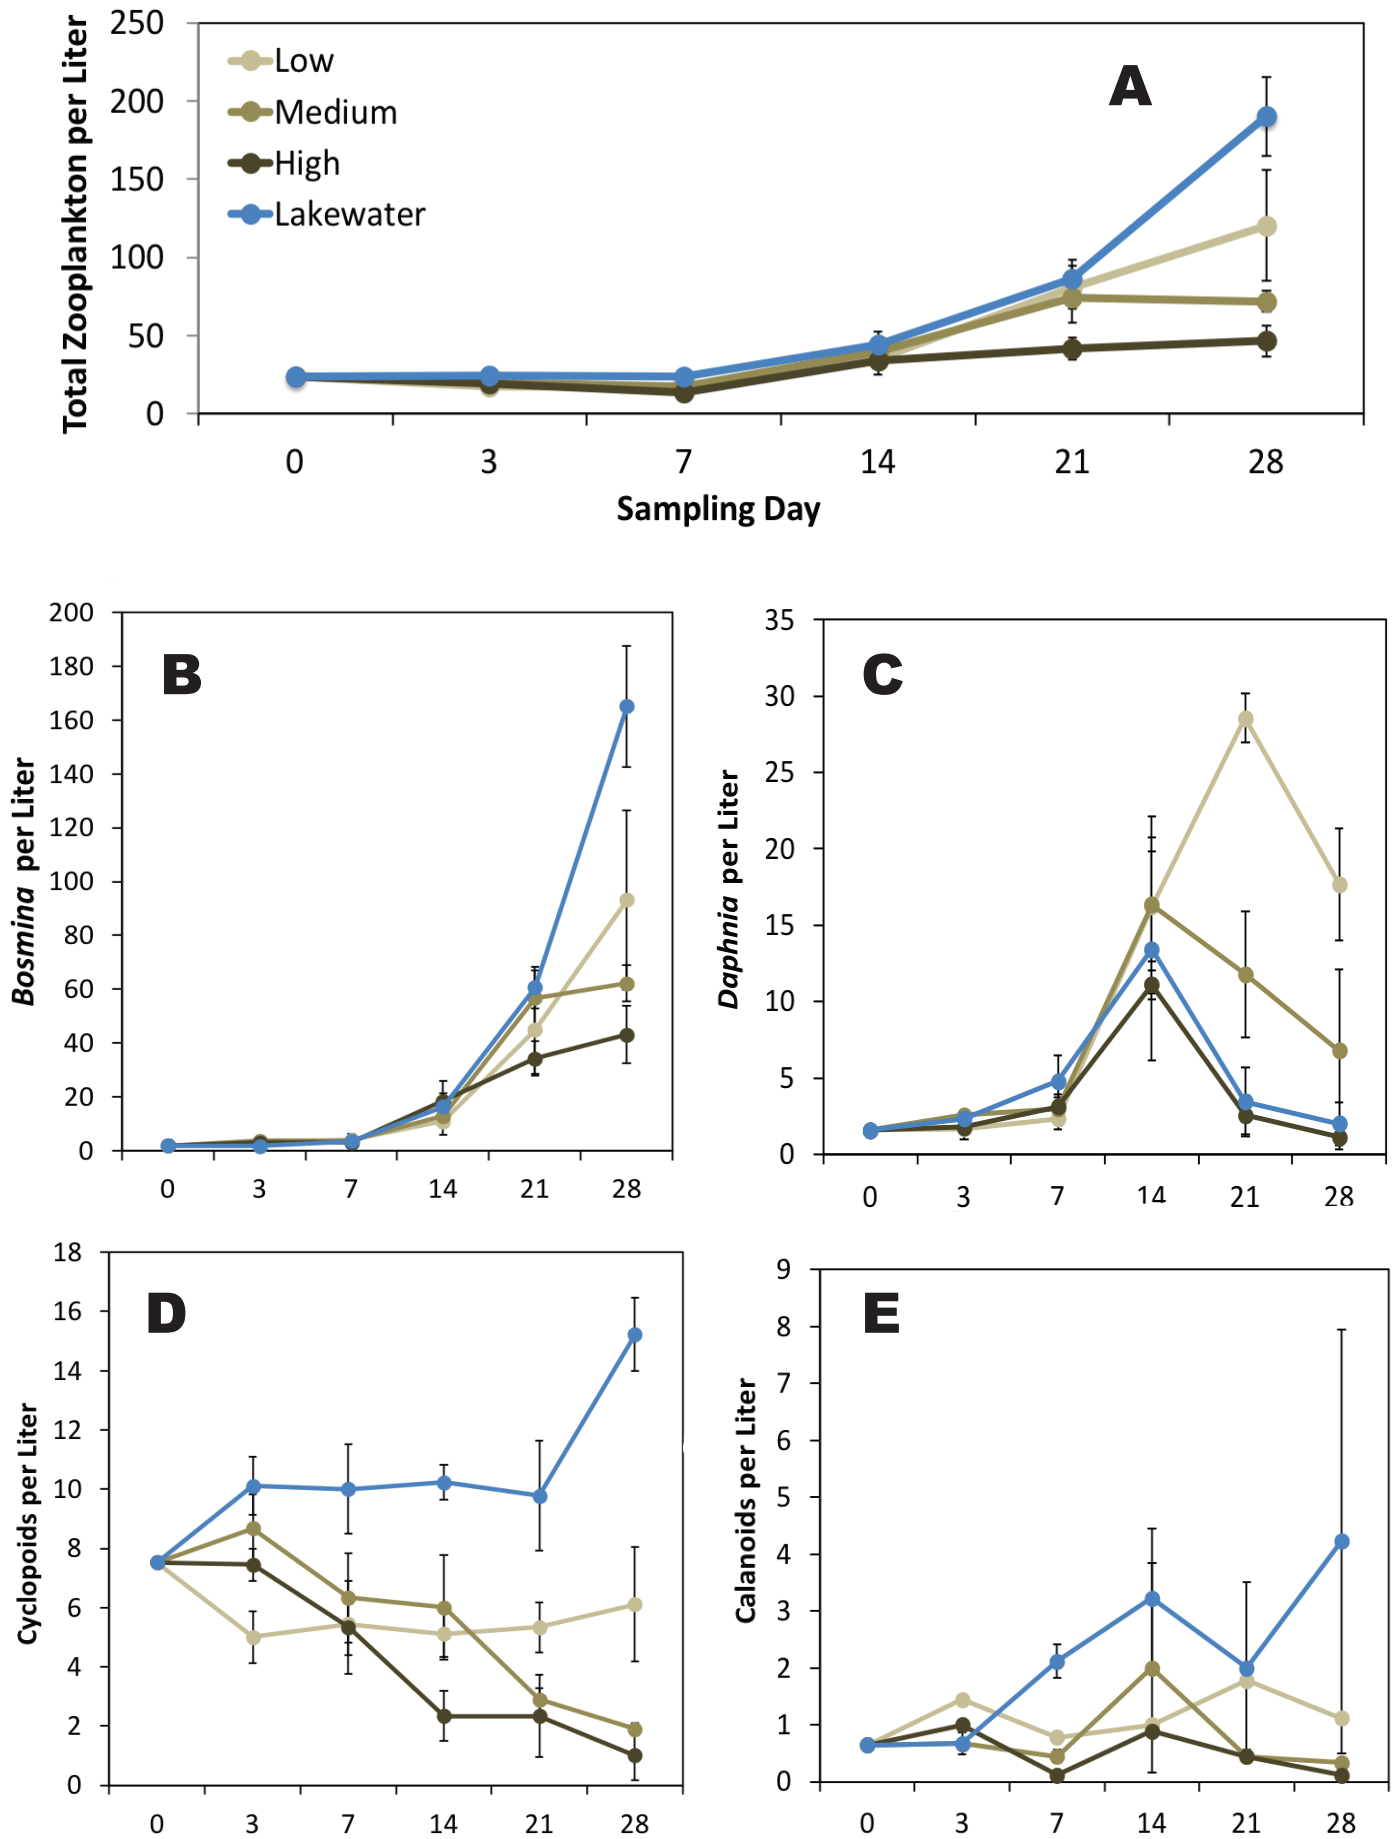

Figure 3



Cladocerans

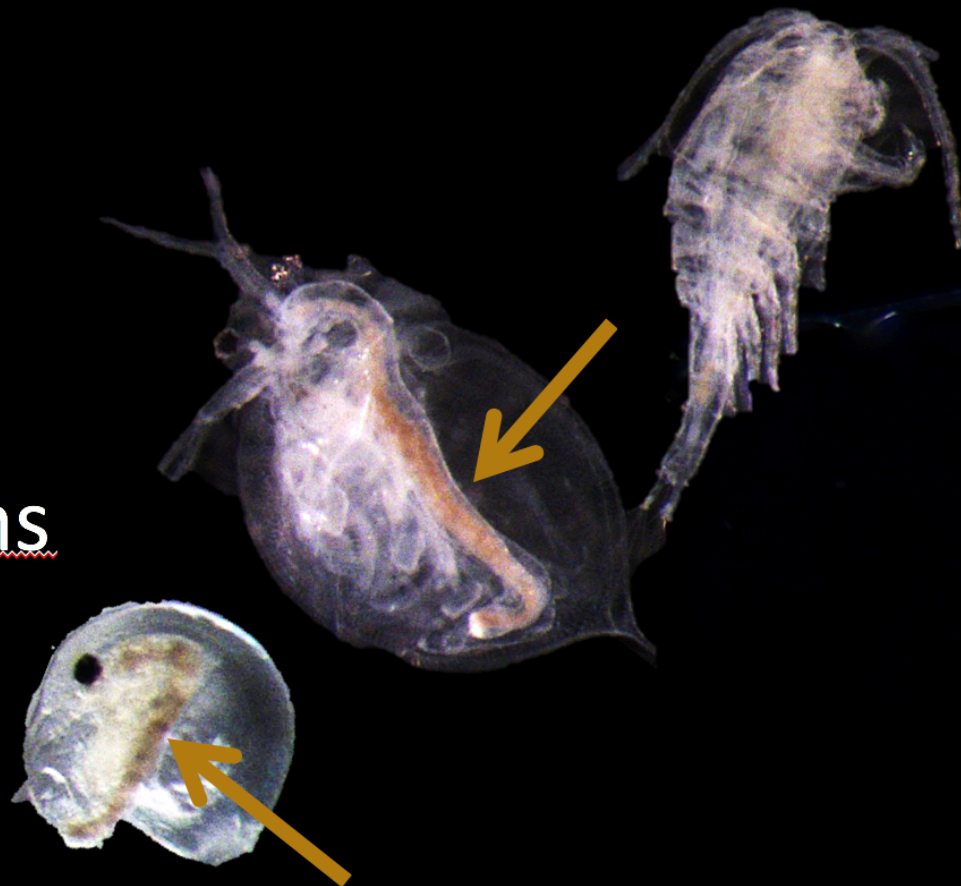

Copepods

Figure 4

**A**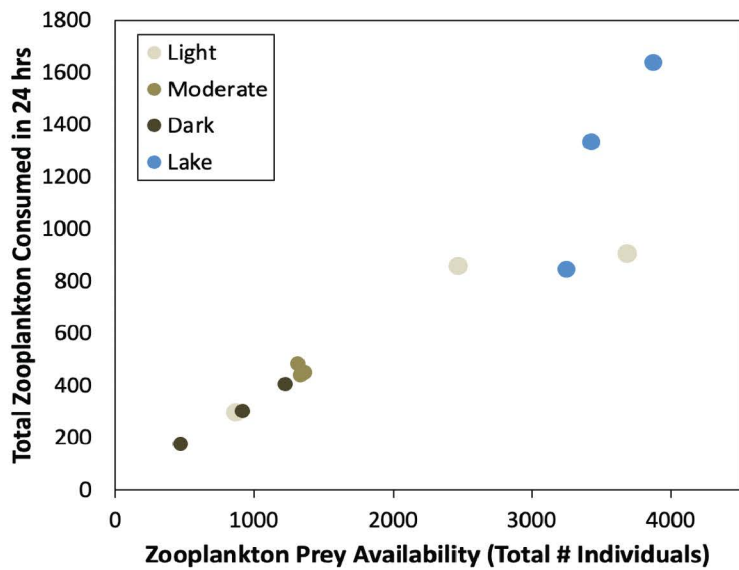**B**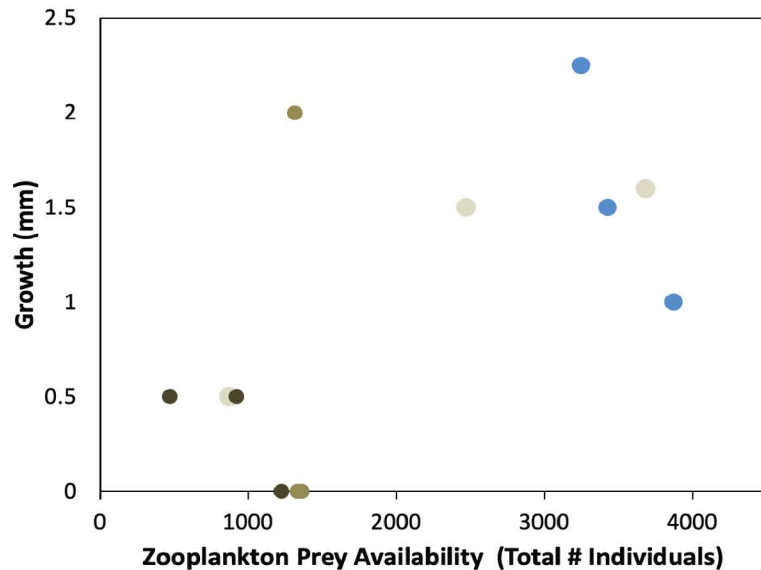**C**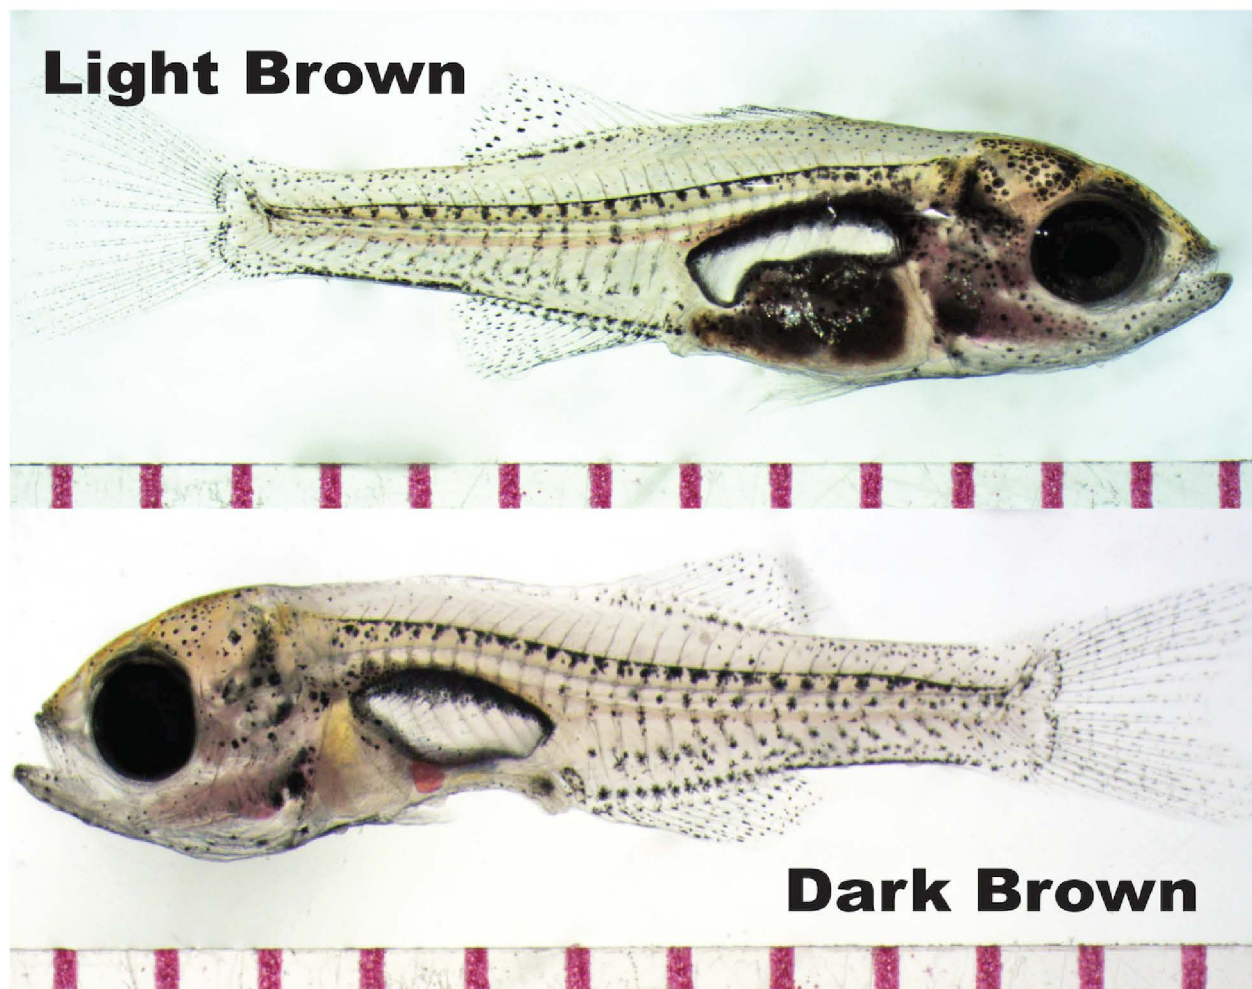

Figure 5

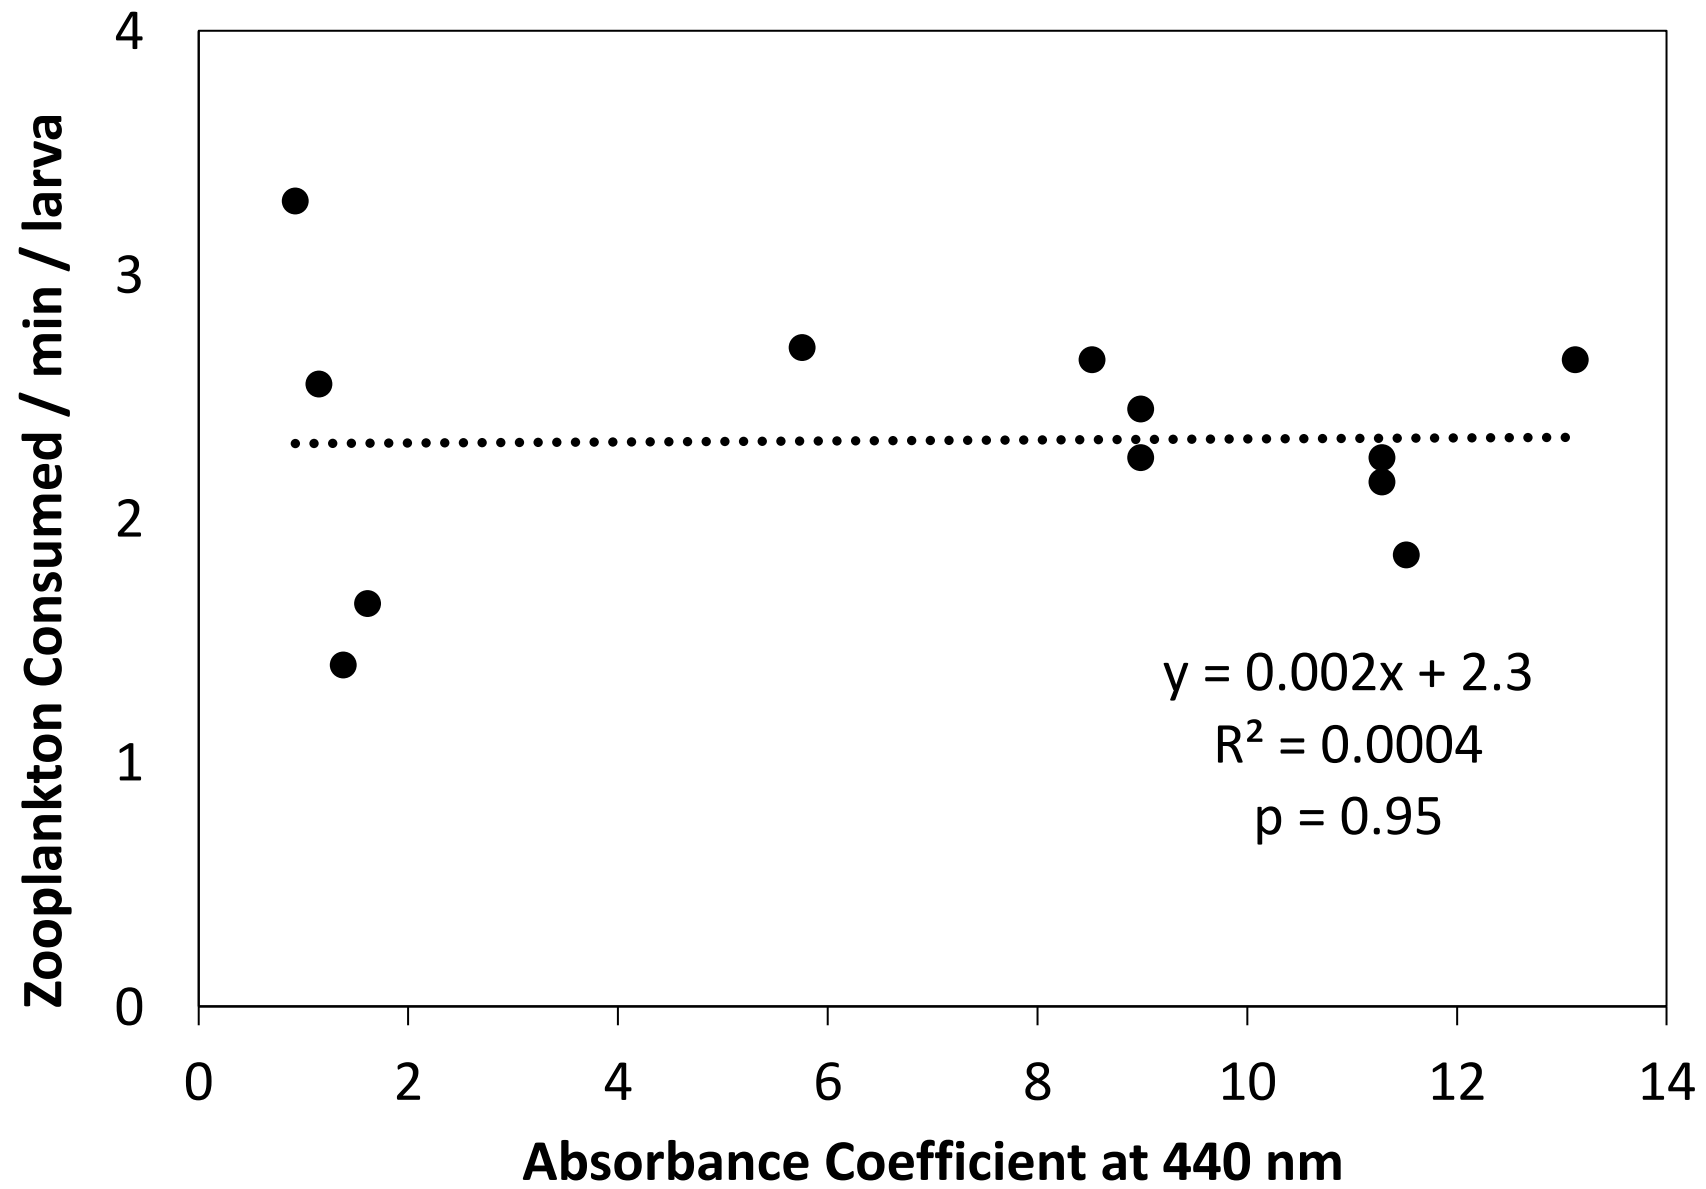

Figure 6

PAR ( $\mu\text{mol}/\text{m}^2/\text{s}$ )

0 200 400 600 800 1000 1200 1400 1600 1800

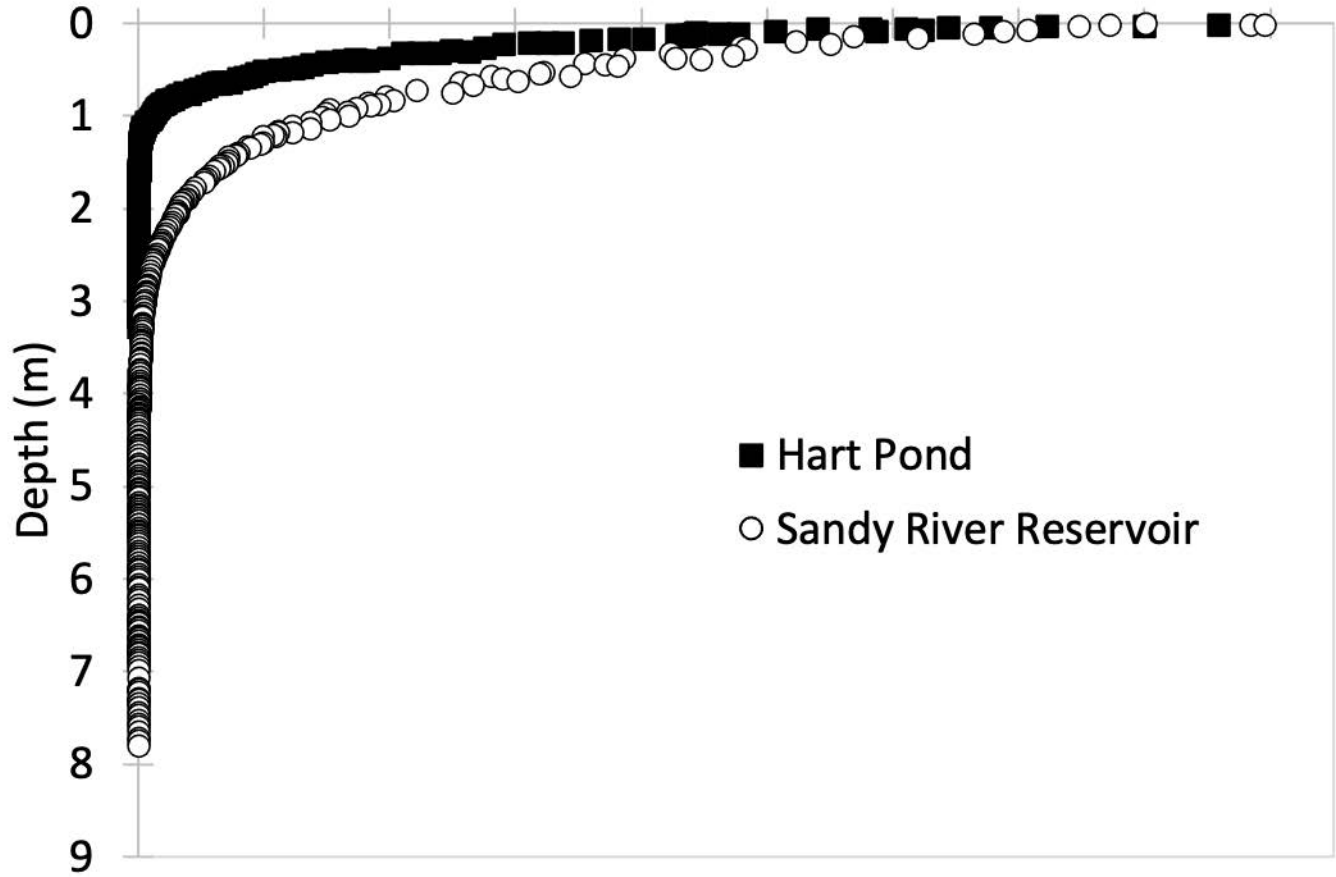

Figure S1

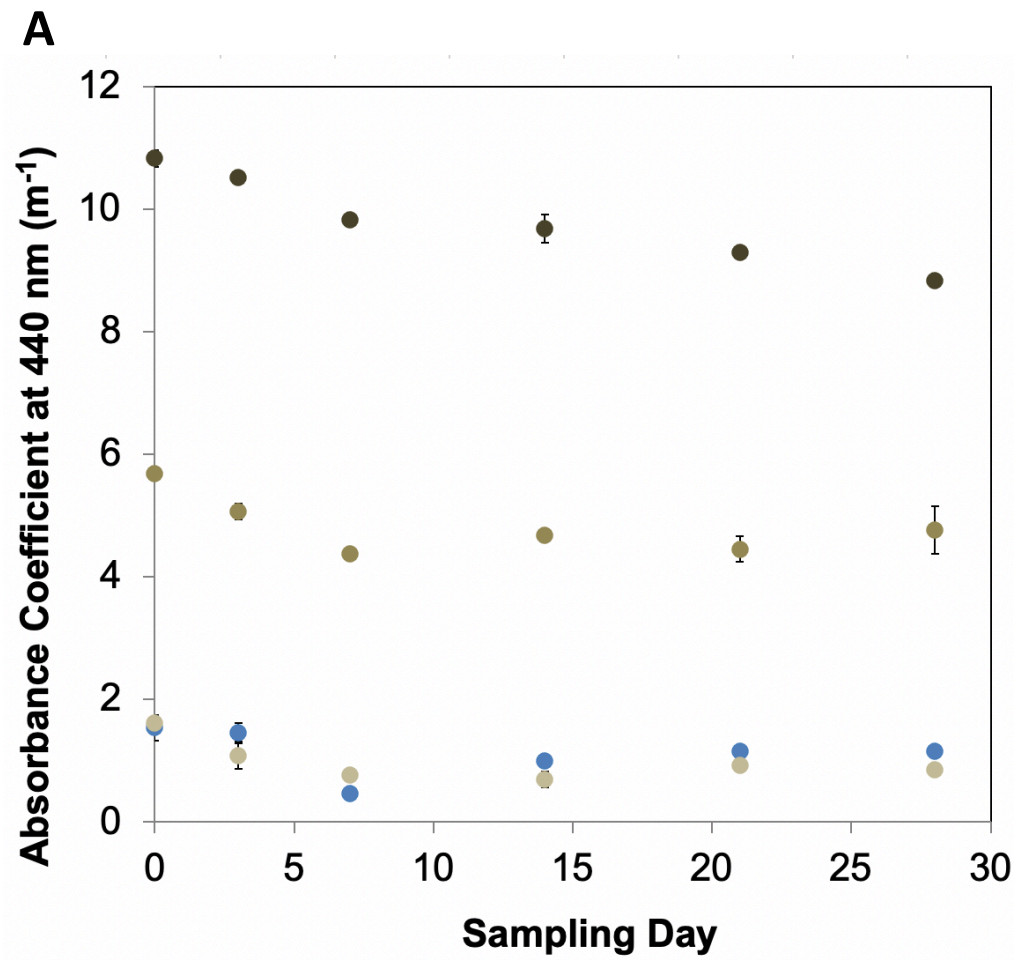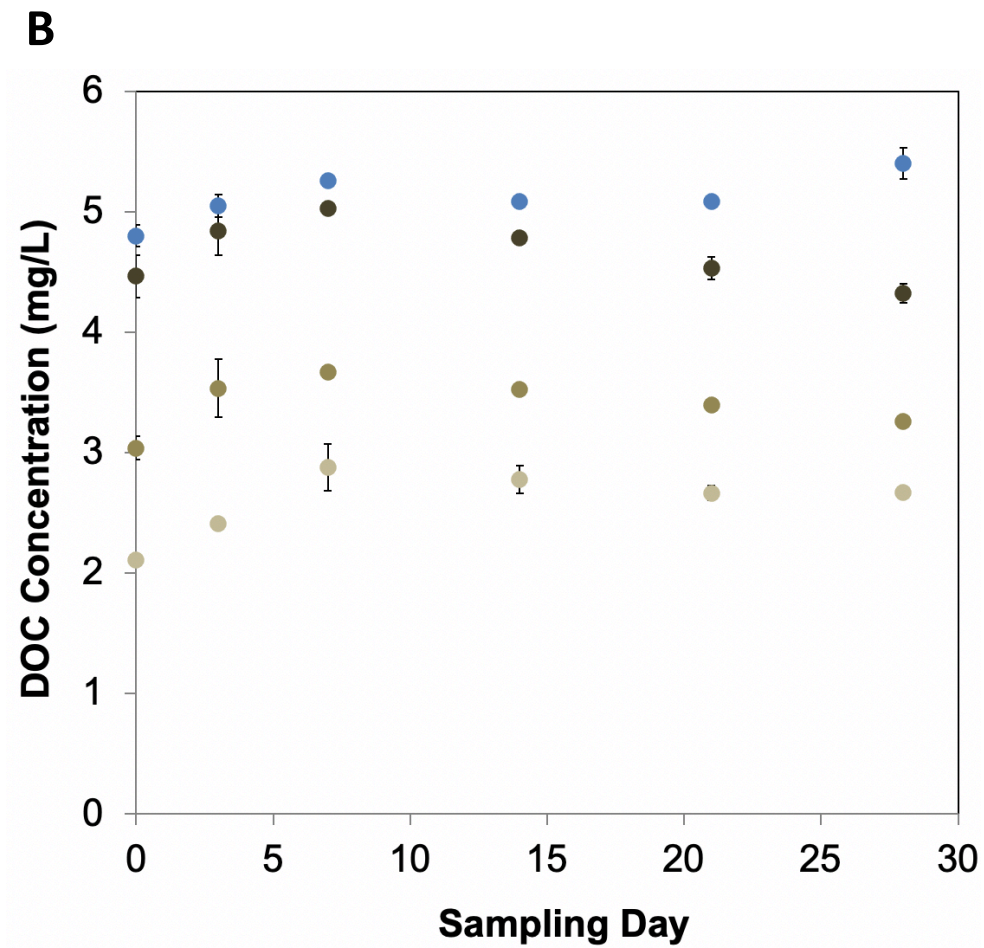

Figure S2
